# Supplementary material for: Squat lobster latitudinal life habitat shifts and metabolic response to combined temperature and oxygen conditions in the Humboldt Current System
Source: Research Square preprint supplement (doi:10.21203/rs.3.rs-6198822/v1), 2025-05-05
Supplement: Supplementary file 1 [file bd9c89b18ec85f369df6299b.docx]

Supplementary Information for

**Squat lobster latitudinal life habitat shifts and metabolic response to combined temperature and oxygen conditions in the Humboldt Current System**

María de los Ángeles Gallardo1,2, Kurt Paschke3,4, Katherina Brokordt5, Marcel Ramos6,2, Martin Thiel 6,7, Matias Pizarro-Koch8 and Beatriz Yannicelli 9, 2*

1. 1 Docotrate in Applied Biology and Ecology, Faculty of Marine Sciencies, Universidad Católica del Norte, Chile.
2. 2 Center of Ecology and Sustainable Management of Oceanic Island (ESMOI), Faculty of Marine Sciencies, Universidad Católica del Norte, Chile
3. 3 Laboratory of Crustacean Ecophisiology (LECOFIC), Aquaculture Institute, Universidad Austral de Chile, Chile
4. 4 FONDAP Center on High Latitude Marine Ecosystems Dynamics (IDEAL), Universidad Austral de Chile, Chile
5. 5 Laboratory of Marine Physiology and Genetics (FIGEMA), Aquaculture Department, Universidad Católica del Norte, Chile.
6. 6 Department of Marine Biology, Faculty of Marine Sciences, Universidad Católica del Norte,
7. 7 MarineGEO Program, Smithsonian Environmental Research Center, Edgewater, Maryland, USA.

8 School of Oceanic Civil Ingeneering, Faculty of Engeneering, Universidad de

Valparaíso, Chile

9 Department of costal-marine interdisciplinary studies (DISCOMAR), Department of Statistical data modeling and artificial intelligence (MEDIA), University Center for the Eastern Region (CURE), Universidad de la República, Uruguay.

* Corresponding author: [byannice@gmail.com](mailto:byannice@gmail.com)

**This PDF file includes:**

Additional Methodology

Figure S1, S2

Tables S1, S2, S3

SI References

ADDITIONAL METHODOLOGY

To characterize the postprandial metabolism, oxygen consumption curves were constructed (mg O2 per g WW-1) as a function of time, for each combined treatment of Temperature-DO. As described by Secor (2009)1, several descriptors of postprandial metabolism were extracted from each curve: (i) Standard metabolic rate (SMR) as the minimum metabolic rate of a postabsorptive individual at rest, (ii) SDA Peak, as the maximum oxygen consumption after feeding, (iii) SDA scope, as the SDA peak divided by the SMR, (iv) total SDA, as the accumulated energy expended above SMR throughout the duration of SDA response, i.e. the area under curve, and (v) SDA duration, time from feeding to resuming SMR.


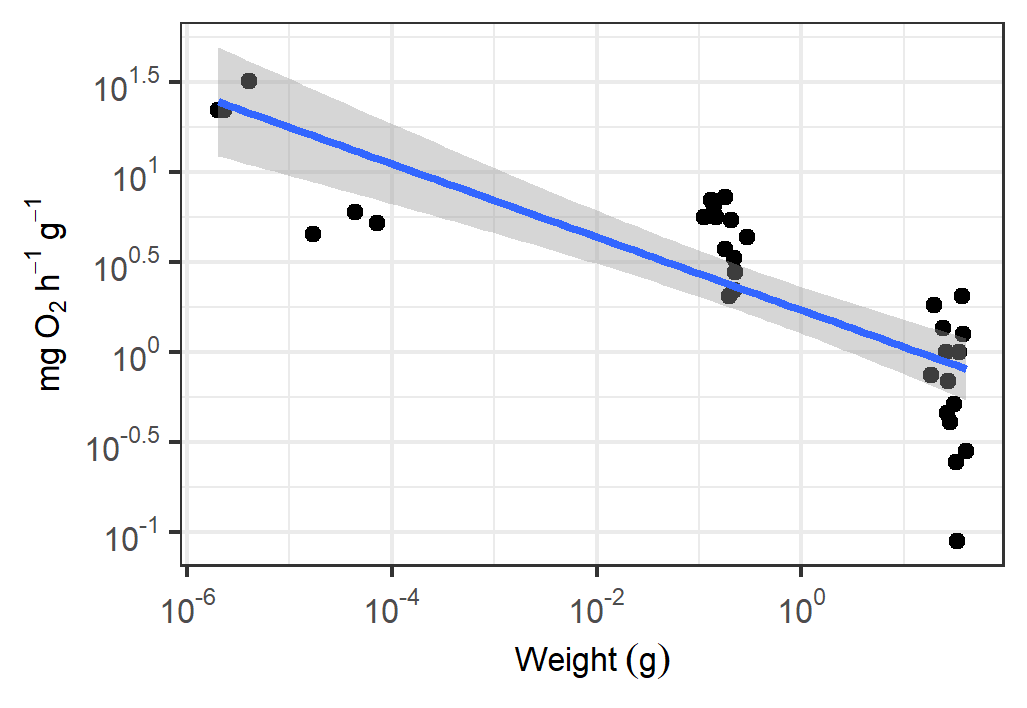


Figure S1. Relationship between the logarithm of individual weight and the logarithm of weight-specific respiration rate across different developmental stages of *Grimothea monodon*. This analysis is based on data from Yannicelli et al. (2013)1, Gallardo et al. (2019)2, and the present study.


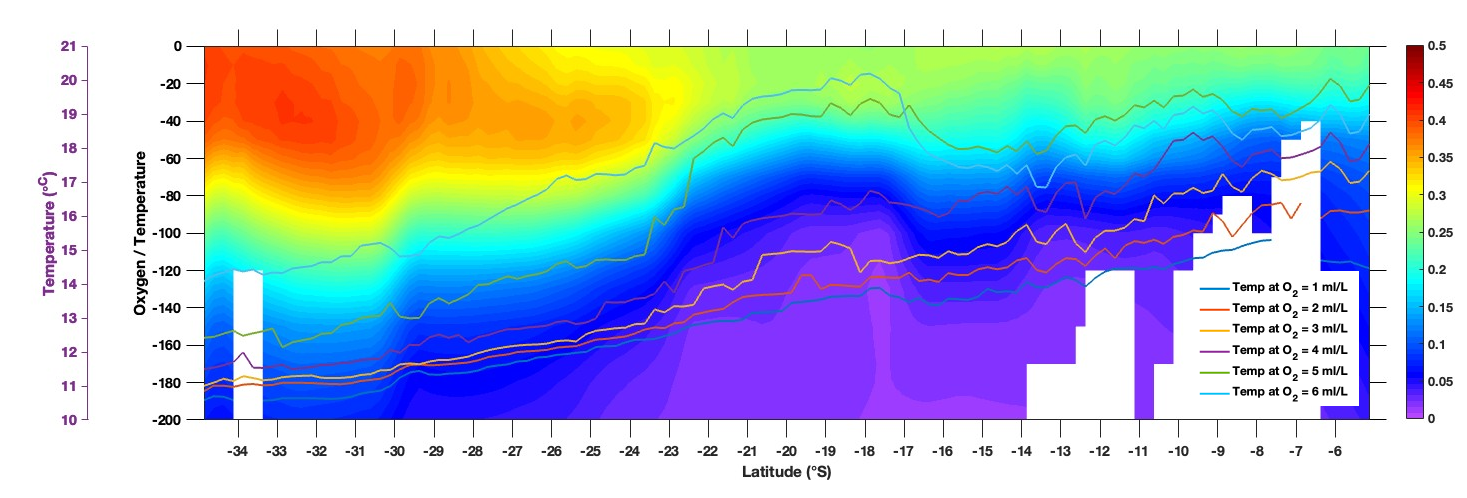


**Figure S2.** Ratio oxygen /temperature (color gradient) within the first 80 km from the coast, extending from the surface to 200 m depth. The lines correspond to the temperature curves associated with oxygen isolines, ranging from 1 to 6 mL L⁻¹. over the upper 200 m. Both temperature and dissolved oxygen data were obtained from the WOA2023 climatology (World OceanAtlas).

**Table S1**. Presence (1) and absence (0) of *Pleuroncodes monodon* between 3ºS-37ºS by latitudinal degree, in benthic and pelagic habitats. TARGET: Acronym used to describe the species or resource type of each Research. **AN**: Anchovy, **AN-SA**: Anchovy & Sardine, **B-Cr**: Benthonic Crustaceans, **BP-R**: Benthic and Pelagic resources, **BR**: Benthic resources, **D-Inv**: demersal Invertebrate, **H**: Hake, **JM**: Jake mackerel, **MB-F**: Macrobenthic fauna, **PM-AN**: *P. monodon* & Anchovy, **PM-B**: *P. monodon* Benthic, **PM-BJ**: *P. monodon*-Benthic juveniles, **PM-BP**: *P. monodon* Benthic & pelagic, **PM-Cj-B**: *P. monodon* & *Cervimunida johni* (benthic), **PM-P**: *P. monodon* pelagic, **PR**: Pelagic resources.

Included maximum, minimum and average size of cephalotorax length (mm). Depth (m), temperature (°C) and oxygen (unit depends on the study; B: botton oxygen; S: surface oxygen) of the presence *of P. monodon*. Year in which the research was conducted. Abundance of *P. monodon*, measured as density or weight. Sample collection instrument (nets, video or acoustic). Research source: Acronym used to describe the Research sources, **IF**:“Informes FIP”, **II**: “Informes IMARPE”, **P**: scientific papers, **T**: Thesis**.**

| **Latitude** | **Target** | **Habit of life (presence/absence)** | | **Minimal size (mm)** | **Maximal size (mm)** | **Mean size (mm)** | **Depth (m)** | **Temperature (°C)** | **Oxygen** | **Year** | **Density/N° ind/Weigh catch** | **Net type/ source** | **Research source** | **References** |
| --- | --- | --- | --- | --- | --- | --- | --- | --- | --- | --- | --- | --- | --- | --- |
| **Pelagic** | **Benthonic** |
| -5 | PM-P | 1 | ˗ | 6 | 15 | ˗ | 1.5-52.5 m | 20.6-21.7°C | 1.84-8.22 ml L-1 | 2001 | NA | Hydroacoustic | T | 4 |
| -6 | PM-P | 1 | ˗ | 6 | 32 | ˗ | 1.5-52.5 m | 2001 | NA | Hydroacoustic | T | 4 |
| -7 | PM-P | 1 | ˗ | 6 | 31 | ˗ | 1.5-52.5 m | 2001 | NA | Hydroacoustic | T | 4 |
| -8 | PM-P | 1 | ˗ | 10 | 30 | ˗ | 1.5-52.5 m | 2001 | NA | Hydroacoustic | T | 4 |
| -9 | PM-P | 1 | ˗ | 8 | 28 | ˗ | 1.5-52.5 m | 2001 | NA | Hydroacoustic | T | 4 |
| -10 | PM-P | 1 | ˗ | 7 | 30 | ˗ | 1.5-52.5 m | 2001 | NA | Hydroacoustic | T | 4 |
| -11 | PM-P | 1 | ˗ | 7 | 28 | ˗ | 1.5-52.5 m | 2001 | NA | Hydroacoustic | T | 4 |
| -12 | PM-P | 1 | ˗ | 9 | 30 | ˗ | 1.5-52.5 m | 2001 | NA | Hydroacoustic | T | 4 |
| -13 | PM-P | 1 | ˗ | 9 | 30 | ˗ | 1.5-52.5 m | 2001 | NA | Hydroacoustic | T | 4 |
| -14 | PM-P | 1 | ˗ | 9 | 31 | ˗ | 1.5-52.5 m | 2001 | NA | Hydroacoustic | T | 4 |
| -15 | PM-P | 1 | ˗ | 6 | 29 | ˗ | 1.5-52.5 m | 2001 | NA | Hydroacoustic | T | 4 |
| -16 | PM-P | 1 | ˗ | 6 | 29 | ˗ | 1.5-52.5 m | 2001 | NA | Hydroacoustic | T | 4 |
| -17 | PM-P | 1 | ˗ | 7 | 27 | ˗ | 1.5-52.5 m | 2001 | NA | Hydroacoustic | T | 4 |
| -11 | PM-BP | 1 | 0 | 6 | 26.8 | - | 30 m | NA | 0.42 kPa | 2013 | 25.5-334 ind. m-2 | Multinet | P | 5 |
| -13 | PM-BP | ˗ | 0 | ˗ | ˗ | ˗ | ˗ | ˗ | ˗ |  | 0 | video | P | 5 |
| -12 | PM-BP | ˗ | 1 | ˗ | ˗ | ˗ | 75-150 m | 13°C | B: 0.2-0.6 ml L-1 |  | 11 ind | video | P | 5 |
| -13 | PM-BP | 1 | ˗ | 6 | 26.8 | ˗ | ˗ | NA | NA |  | <10 ind m-2 | Multinet | P | 5 |
| -14 | PM-BP | 1 | ˗ | 6 | 26.8 | ˗ | ˗ | NA | NA |  | 25.5-334 ind m-2 | Multinet | P | 5 |
| -3 | PR | 0 | ˗ | ˗ | ˗ | ˗ | ˗ | ˗ | ˗ | 2003 | 0 | Hydroacoustic | II | 6 |
| -4 | PR | 0 | ˗ | ˗ | ˗ | ˗ | ˗ | ˗ | ˗ | 2003 | 0 | Hydroacoustic | II | 6 |
| -5 | PR | 0 | ˗ | ˗ | ˗ | ˗ | ˗ | ˗ | ˗ | 2003 | 0 | Hydroacoustic | II | 6 |
| -6 | PR | 0 | ˗ | ˗ | ˗ | ˗ | ˗ | ˗ | ˗ | 2003 | 0 | Hydroacoustic | II | 6 |
| -7 | PR | 1 | ˗ | ˗ | ˗ | ˗ | ˗ | ˗ | ˗ | 2003 | 2,948 Ton | Hydroacoustic | II | 6 |
| -8 | PR | 1 | ˗ | ˗ | ˗ | ˗ | ˗ | ˗ | ˗ | 2003 | 113,513 Ton | Hydroacoustic | II | 6 |
| -9 | PR | 1 | ˗ | ˗ | ˗ | ˗ | ˗ | ˗ | ˗ | 2003 | 192,374 Ton | Hydroacoustic | II | 6 |
| -10 | PR | 1 | - | - | - | - | - | ˗ | ˗ | 2003 | 239,228 Ton | Hydroacoustic | II | 6 |
| -11 | PR | 1 | ˗ | ˗ | ˗ | ˗ | ˗ | ˗ | ˗ | 2003 | 702,560 Ton | Hydroacoustic | II | 6 |
| -12 | PR | 1 | ˗ | ˗ | ˗ | ˗ | ˗ | ˗ | ˗ | 2003 | 400,836 Ton | Hydroacoustic | II | 6 |
| -13 | PR | 1 | ˗ | ˗ | ˗ | ˗ | ˗ | ˗ | ˗ | 2003 | 32,182 Ton | Hydroacoustic | II | 6 |
| -14 | PR | 1 | - | - | - | - | - | ˗ | ˗ | 2003 | 252,074 Ton | Hydroacoustic | II | 6 |
| -15 | PR | 1 | ˗ | ˗ | ˗ | ˗ | ˗ | ˗ | ˗ | 2003 | 61,632 Ton | Hydroacoustic | II | 6 |
| -16 | PR | 1 | ˗ | ˗ | ˗ | ˗ | ˗ | ˗ | ˗ | 2003 | 63,060 Ton | Hydroacoustic | II | 6 |
| -17 | PR | 0 | ˗ | ˗ | ˗ | ˗ | ˗ | ˗ | ˗ | 2003 | 0 | Hydroacoustic | II | 6 |
| -18 | PR | 1 | ˗ | ˗ | ˗ | ˗ | ˗ | ˗ | ˗ | 2003 | Presence | Hydroacoustic | II | 6 |
| -19 | PR | 1 | ˗ | ˗ | ˗ | ˗ | ˗ | ˗ | ˗ | 2003 | Presence | Hydroacoustic | II | 6 |
| -20 | PR | 1 | ˗ | ˗ | ˗ | ˗ | ˗ | ˗ | ˗ | 2003 | Presence | Hydroacoustic | II | 6 |
| -19 | JM | 1 | - | - | - | - | 12-15 m | ~18°C | - | 2008 | 4.8 kg (1,641 ind) | Hydroacoustic | IF | 7 |
| -3 | H | - | 0 | - | - | - | - | S:21-25°C  B: 17 °C | B: 0.5-1 ml L-1 | 2004 | 0 | demersal trawl | II | 8 |
| -4 | H | - | 0 | - | - | - | - | S: 18-22°C  B: 10-17°S | B: 0.5 ml L-1 | 2004 | 0 | demersal trawl | II | 8 |
| -5 | H | - | 0 | - | - | - | - | S:19°C  B: 15°C | B: 1 ml L-1 | 2004 | 0 | demersal trawl | II | 8 |
| -6 | H | - | 0 | - | - | - | - | S: 21-22°C  B:15°C | B: 0.5 ml L-1 | 2004 | 0 | demersal trawl | II | 8 |
| -7 | H | - | 1 | 46 | 58 | 24.7 | 150 m | S: 19-22°C / B:15°C | B: 1.5 ml L-1 | 2004 | 167.54 kg | demersal trawl | II | 8 |
| -8 | H | - | 0 | - | - | - | - | S: 22°C  B: 17°C | B: 1.5 ml L-1 | 2004 | 0 | demersal trawl | II | 8 |
| -9 | H | - | 0 | - | - | - | - | - | - | 2004 | 0 | demersal trawl | II | 8 |
| -3 | H | - | 0 | - | - | - | - | S: 27°C  B: 12°C | B: 0.5 ml L-1 | 2006 | 0 | demersal trawl | II | 9 |
| -4 | H | - | 0 | - | - | - | - | S: 25°C  B: 12-15°C | B: 0.5 ml L-1 | 2006 | 0 | demersal trawl | II | 9 |
| -5 | H | - | 0 | - | - | - | - | S: 22°C  B: 15°C | B: 0.5 ml L-1 | 2006 | 0 | demersal trawl | II | 9 |
| -6 | H |  | 0 | - | - | - | - | S: 21°C  B: 9-12°C | B: 0.5 ml L-1 | 2006 | 0 | demersal trawl | II | 9 |
| -7 | H | - | 1 | 11 | 39 | 22.6 | 42-208 m | S: <18; B: 13-15°C | B: 0.2 ml L-1 | 2006 | 363.34 kg (530 ind) | demersal trawl | II | 9 |
| -8 | H | - | 0 | - | - | - | - | S: 21°C  B: 13°C | B: 0.3 ml L-1 | 2006 | 0 | demersal trawl | II | 9 |
| -9 | H | - | 0 | - | - | - | - | S. 22°C  B: 12°C | B: 0.3 ml L-1 | 2006 | 0 | demersal trawl | II | 9 |
| -3 | H | - | 0 | - | - | - | - | S: 25°C  B: 17°C | B: 0.5 ml L-1 | 2007 | 0 | demersal trawl | II | 10 |
| -4 | H | - | 0 | - | - | - | - | S: 23°C  B: 12°C | B: 0.5 ml L-1 | 2007 | 0 | demersal trawl | II | 10 |
| -5 | H | - | 0 | - | - | - | - | S: 22°C  B: 13-19°C | B: 0.5 ml L-1 | 2007 | 0 | demersal trawl | II | 10 |
| -6 | H | - | 0 | - | - | - | - | S: 22-24°C  B: 8-17°C | B: 0.5 ml L-1 | 2007 | 0 | demersal trawl | II | 10 |
| -7 | H | - | 1 | - | - | - | - | S: 22-23°C  B: 10-19°C | B: 0.5-1 ml L-1 | 2007 | Hake prey | demersal trawl | II | 10 |
| -8 | H | - | 1 | - | - | - | - | S: 22-25°C  B: 1-15°C | B: 0.5-1 ml L-1 | 2007 | 36 kg | demersal trawl | II | 10 |
| -9 | H | - | 0 | - | - | - | - | S:25°C  B:15-17°C | B: 0.5 ml L-1 | 2007 | 0 | demersal trawl | II | 10 |
| -15 | PR | 1 | - | - | - | - | - | - | - | 2003 | 3,806 Ton | Hydroacoustic-  Pelagic trawl | II | 11 |
| -14 | PR | 1 | - | - | - | - | - | - | - | 2003 | 22,157 Ton | Hydroacoustic-  Pelagic trawl | II | 11 |
| -12 | PR | 1 | - | - | - | - | - | - | - | 2003 | 56,197 Ton | Hydroacoustic-  Pelagic trawl | II | 11 |
| -11 | PR | 1 | - | - | - | - | - | - | - | 2003 | 15,924 Ton | Hydroacoustic-  Pelagic trawl | II | 11 |
| -13 | PR | 1 | - | - | - | - | - | - | - | 2003 | 22.150 Ton | Hydroacoustic-  Pelagic trawl | II | 11 |
| -10 | PR | 1 | - | - | - | - | - | - | - | 2003 | 12,697 Ton | Hydroacoustic-  Pelagic trawl | II | 11 |
| -9 | PR | 1 | - | - | - | - | - | - | - | 2003 | 110,527 Ton | Hydroacoustic-  Pelagic trawl | II | 11 |
| -8 | PR | 1 | - | - | - | - | - | - | - | 2003 | 375,792 Ton | Hydroacoustic-  Pelagic trawl | II | 11 |
| -7 | PR | 1 | - | - | - | - | - | - | - | 2003 | 175,786 Ton | Hydroacoustic-  Pelagic trawl | II | 11 |
| -6 | PR | 1 | - | - | - | - | - | - | - | 2003 | 200,006 Ton | Hydroacoustic-  Pelagic trawl | II | 11 |
| -6 | PM-AN | 1 | - | - | - | - | 40 m | <18 °C | Upper oxycline | 1998-2006 | 200-1500 ESDU | Hydroacoustic | P | 12 |
| -7 | PM-AN | 1 | - | - | - | - | 40 m | 1998-2006 | Hydroacoustic | P | 12 |
| -8 | PM-AN | 1 | - | - | - | - | 40 m | 1998-2006 | Hydroacoustic | P | 12 |
| -9 | PM-AN | 1 | - | - | - | - | 40 m | 1998-2006 | Hydroacoustic | P | 12 |
| -10 | PM-AN | 1 | - | - | - | - | 40 m | <18 °C | Upper oxycline | 1998-2006 | 200-1500 ESDU | Hydroacoustic | P | 12 |
| -11 | PM-AN | 1 | - | - | - | - | 40 m | 1998-2006 | Hydroacoustic | P | 12 |
| -12 | PM-AN | 1 | - | - | - | - | 40 m | 1998-2006 | Hydroacoustic | P | 12 |
| -13 | PM-AN | 1 | - | - | - | - | 40 m | 1998-2006 | Hydroacoustic | P | 12 |
| -14 | PM-AN | 1 | - | - | - | - | 40 m | 1998-2006 | Hydroacoustic | P | 12 |
| -15 | PM-AN | 1 | - | - | - | - | 40 m | 1998-2006 | Hydroacoustic | P | 12 |
| -16 | PM-AN | 1 | - | - | - | - | 40 m | 1998-2006 | Hydroacoustic | P | 12 |
| -17 | PM-AN | 1 | - | - | - | - | 40 m | 1998-2006 | Hydroacoustic | P | 12 |
| -18 | PM-AN | 1 | - | - | - | - | 40 m | 1998-2006 | Hydroacoustic | P | 12 |
| -12 | B-Cr | - | 1 | - | - | - | 160 m | NA | NA | 1965 | 7 ind | shrimp trawl | P | 13 |
| -3 | D-Inv | - | 0 | - | - | - | - | - | - | 2003 | 0 | Agassiz trawl | II | 14 |
| -4 | D-Inv | - | 0 | - | - | - | - | - | - | 2003 | 0 | Agassiz trawl | II | 14 |
| -5 | D-Inv | - | 0 | - | - | - | - | - | - | 2003 | 0 | Agassiz trawl | II | 14 |
| -6 | D-Inv | - | 1 | 20 | 34 | 27.9 | - | cool coastal waters | - | 2003 | NA | Agassiz trawl | II | 14 |
| -7 | D-Inv | - | 1 | 19 | 42 | 27.9 | - | cool coastal waters | - | 2003 | NA | Agassiz trawl | II | 14 |
| -8 | D-Inv | - | 0 | - | - | - | - | - | - | 2003 | 0 | Agassiz trawl | II | 14 |
| -9 | D-Inv | - | 0 | - | - | - | - | - | - | 2003 | 0 | Agassiz trawl | II | 14 |
| -30 | PM-Cj-B | - | 1 | - | - | - | 102-210 m | - | - | 2009-2010 | 61.2-162.5 ind m-2 | video | P | 15 |
| -32 | PM-Cj-B | - | 1 | 20 | 47 | 35 | 200-400 m | - | - | 1969-1970 | 389 ind | demersal trawl | P | 16 |
| -33 | PM-Cj-B | - | 1 | 200-400 m | - | - | 1969-1970 | demersal trawl | P | 16 |
| -30 | PM-Cj-B | - | 1 | 13 | 40 | 28.7 | 50-300 m | 10-12°C | <0.5-3 ml L-1 | 1966-1983 | 9961-49729 Ton annual | demersal trawl | P | 17 |
| -31 | PM-Cj-B | - | 1 |  |  |  | 50-300 m |  |  | 1966-1983 |  | demersal trawl | P | 17 |
| -32 | PM-Cj-B | - | 1 |  |  |  | 50-300 m |  |  | 1966-1983 |  | demersal trawl | P | 17 |
| -33 | PM-Cj-B | - | 1 |  |  |  | 50-300 m |  |  | 1966-1983 |  | demersal trawl | P | 17 |
| -34 | PM-Cj-B | - | 1 |  |  |  | 50-300 m |  |  | 1966-1983 |  | demersal trawl | P | 17 |
| -35 | PM-Cj-B | - | 1 |  |  |  | 50-300 m |  |  | 1966-1983 |  | demersal trawl | P | 17 |
| -36 | PM-Cj-B | - | 1 |  |  |  | 50-300 m |  |  | 1966-1983 |  | demersal trawl | P | 17 |
| -37 | PM-Cj-B | - | 1 | 13 | 40 | 28.7 | 50-300 m | 10-12°C | <0.5-3 ml L-1 | 1966-1983 | 9961-49729 Ton annual | demersal trawl | P | 17 |
| -13 | AN | 1 | - | - | - | - | 50 m | 17.8°C | 6.6 ml L-1 | 2004 | 563.6 m2 nmi-2 | acoustic records | P | 18 |
| -14 | AN | 1 | - | - | - | - | 50m | 16.6°C | 6.2 ml L-1 | 2004 | acoustic records | P | 18 |
| -30 | PM-Cj-B | - | 1 | 24 | 43 | - | - | - | - | 2007 | NA | demersal trawl | P | 19 |
| -36 | PM-BJ | - | 1 | 3 | 10 | 6.1 (1991)  5.3 (1992) | 40, 64 and 96 m | B: 11.6°C | B: 0.87 mlL-1 | 1991-1992 | 0.02-2 ind m-2 | Agassiz trawl | P | 20 |
| -36 | MB-F | - | 1 | - | - | - | 122 m | B: 10.8°C | B: 0.1 mlL-1 | 1999 | 6,851 ind m-2 | Agassiz trawl | P | 21 |
| -37 | MB-F | - | 1 | - | - | - | 360 m | B: 8.9°C | B: 0.52 mlL-1 | 1999 | 11,004 ind m-2 | Agassiz trawl | P | 21 |
| -25 | PM-B | - | 1 | 17 | 39 | - | ~200 m | - | - | 2003 | 27.03 Ton Km-2 | demersal trawl | IF | 22 |
| -26 | PM-B | - | 1 | 13 | 41 | - | ~200 m | - | - | 2003 | 142.90 Ton Km-2 | demersal trawl | IF | 22 |
| -27 | PM-B | - | 1 | 12 | 41 | - | 200-250 m | - | - | 2003 | 24.71 Ton Km-2 | demersal trawl | IF | 22 |
| -28 | PM-B | - | 1 | 28 | 40 | - | ~250 m | - | - | 2003 | 27.65 Ton Km-2 | demersal trawl | IF | 22 |
| -29 | PM-B | - | 1 | 18 | 40 | - | 200-300 m | - | - | 2003 | 25.53 Ton Km-2 | demersal trawl | IF | 22 |
| -30 | PM-B | - | 1 | 10 | 47 | - | ~200 m | - | - | 2003 | 35.26 Ton Km-2 | demersal trawl | IF | 22 |
| -3 | H | - | 0 | - | - | - | 46-200 m | - | - | 2009 | 0 | demersal trawl | II | 23 |
| -4 | H | - | 0 | - | - | - | 46-350 m | - | - | 2009 | 0 | demersal trawl | II | 23 |
| -5 | H | - | 0 | - | - | - | 46-350 m | - | - | 2009 | 0 | demersal trawl | II | 23 |
| -6 | H | - | 1 | 6  6 | 26  26 | 17.2 | 37 m | S: 18°C  B:156-16 | S: 4 ml L-1  B: 0.5 ml L-1 | 2009 | 377.16 kg and Hake prey | demersal trawl | II | 23 |
| -7 | H | - | 1 | 11.7 | 68 m | S: 18-21°C  B:13-18 | S: 5 ml L-1  B: 0.5-1 ml L-1 | 2009 | Hake prey | demersal trawl | II | 23 |
| -8 | H | - | 1 | 12.1 | 68 m | S: 18°C  B:12-17 | S: 5-6 ml L-1  B: 0.5 ml L-1 | 2009 | Hake prey | demersal trawl | II | 23 |
| -9 | H | - | 0 | - | - | - | 135 m | - | - | 2009 | 0 | demersal trawl | II | 23 |
| -3 | H |  | 0 | - | - | - | - | - | - | 2004 | 0 | demersal trawl | II | 24 |
| -4 | H |  | 0 | - | - | - | - | - | - | 2004 | 0 | demersal trawl | II | 24 |
| -5 | H |  | 0 | - | - | - | - | - | - | 2004 | 0 | demersal trawl | II | 24 |
| -6 | H |  | 1 | - | - | - | - | - | - | 2004 | 32.2 Kg | demersal trawl | II | 24 |
| -7 | H |  | 1 | - | - | - | - | - | - | 2004 | 14.2 Kg | demersal trawl | II | 24 |
| -8 | H |  | 0 | - | - | - | - | - | - | 2004 | 2.28 kg | demersal trawl | II | 24 |
| -9 | H | - | 0 | - | - | - | - | - | - | 2004 | 0 | demersal trawl | II | 24 |
| -4 | PM-P | 1 | - | - | 5 | 33 | 0-40 m | - | - | 2001 | 8517 total ind. | Midwater pelagic net | P | 25 |
| -5 | PM-P | 1 | - | - | 0-40 m | - | - | 2001 | Midwater pelagic net | P | 25 |
| -6 | PM-P | 1 | - | - | 0-40 m | - | - | 2001 | Midwater pelagic net | P | 25 |
| -7 | PM-P | 1 | - | - | 0-40 m | - | - | 2001 | Midwater pelagic net | P | 25 |
| -8 | PM-P | 1 | - | - | 0-40 m | - | - | 2001 | Midwater pelagic net | P | 25 |
| -9 | PM-P | 1 | - | - | 0-40 m | - | - | 2001 | Midwater pelagic net | P | 25 |
| -10 | PM-P | 1 | - | - | 0-40 m | - | - | 2001 | Midwater pelagic net | P | 25 |
| -11 | PM-P | 1 | - | - | 0-40 m | - | - | 2001 | Midwater pelagic net | P | 25 |
| -12 | PM-P | 1 | - | - | 0-40 m | - | - | 2001 | Midwater pelagic net | P | 25 |
| -13 | PM-P | 1 | - | - | 0-40 m | - | - | 2001 | Midwater pelagic net | P | 25 |
| -14 | PM-P | 1 | - | - | 0-40 m | - | - | 2001 | Midwater pelagic net | P | 25 |
| -15 | PM-P | 1 | - | - | 0-40 m | - | - | 2001 | Midwater pelagic net | P | 25 |
| -16 | PM-P | 1 | - | - | 0-40 m | - | - | 2001 | Midwater pelagic net | P | 25 |
| -17 | PM-P | 1 | - | - | 0-40 m | - | - | 2001 | Midwater pelagic net | P | 25 |
| -18 | PM-P | 1 | - | - | 0-40 m | - | - | 2001 | Midwater pelagic net | P | 25 |
| -29 | B-Cr | - | 1 | - | - | - | 180 m | - | - | 2007-2009 | 2.70-1596.73 kg h-1 | demersal trawl | P | 26 |
| -30 | B-Cr | - | 1 | - | - | - | 180 m | - | - | 2007-2009 | demersal trawl | P | 26 |
| -35 | PM-B |  | 1 | 23 | 40 | >32 | 100-250 m | - | - | 1991 | 10323 annual tons | demersal trawl | P | 27 |
| -36 | PM-B |  | 1 | 23 | 40 | 28-32 | 50-200 m | - | - | 1991 | demersal trawl | P | 27 |
| -34 | PM-B |  | 1 | 17 | 36.5 | 25.2-36.5 | 100-200 m | - | - | 1982-1993 | NA | demersal trawl | P | 28 |
| -35 | PM-B |  | 1 | 50-200 m | - | - | 1982-1993 | NA | demersal trawl | P | 28 |
| -36 | PM-B |  | 1 | 50-200 m | - | - | 1982-1993 | NA | demersal trawl | P | 28 |
| -37 | PM-B |  | 1 | 50-100 m | - | - | 1982-1993 | NA | demersal trawl | P | 28 |
| -23 | PM-P | 1 | - | 20 | 40 | - | 20-40 m | - | - | 1971, 1974-1975 | 4594 ind | Trawl (2 m diameter, 1 cm) | P | 29 |
| -35 | PM-B | - | 1 | 14 | 45 | 17.1-39.4 | - | - | - | 1982-1986 & 1991 | NA | demersal trawl | P | 30 |
| -36 | PM-B | - | 1 | 17.1-39.4 | - | - | - | 1982-1986 & 1991 | NA | demersal trawl |
| -36 | PM-BJ | - | 1 | 3 | 16 | 6.51 (1st year class)  12.5 (2st year) | 100-200 m | B: 11.2-11.6°C | B: 0.34 ml L-1 | 1993 | 2.39 ind. m-2/  3290 x106 ind. | Agassiz trawl | P | 31 |
| -37 | PM-BJ | - | 1 | 3 | 16 | 6.51 (1st year class)  12.5 (2st year) | 100-200 m | B: 11.2-11.6°C | B: 0.34 ml L-1 | 1993 | 2.39 ind. m-2/  3290 x106 ind. | Agassiz trawl | P | 31 |
| -18 | AN-SA | 1 | - | - | - | - | - | - | - | 2009 | 517 Ton | pelagic net | IF | 32 |
| -35 | AN | 0 | - | - | - | - | 0-100 m | S: >15  100m: 10°C | 100 m: 2 ml L-1 | 1999 | 0 | Hydroacoustic | IF | 33 |
| -36 | AN | 0 | - | - | - | - | 0-100 m | S: 12-13  100m: 10°C | 100 m: 2 ml L-1 | 1999 | 0 | Hydroacoustic | IF | 33 |
| -37 | AN | 0 | - | - | - | - | 0-100 m | S: 13  100m: 10°C | 100 m: 1 ml L-1 | 1999 | 0 | Hydroacoustic | IF | 33 |
| -38 | AN | 0 | - | - | - | - | 0-100 m | S: 12-13  100m: 10°C | 100 m: 1 ml L-1 | 1999 | 0 | Hydroacoustic | IF | 33 |
| -39 | AN | 0 | - | - | - | - | 0-100 m | S: 12  100m: 10°C | 100 m: 2 ml L-1 | 1999 | 0 | Hydroacoustic | IF | 33 |
| -18 | PR | 0 | - | - | - | - | - | - | - | 2007 | 0 | Hydroacoustic | IF | 34 |
| -19 | PR | 0 | - | - | - | - | - | - | - | 2007 | 0 | Hydroacoustic | IF | 34 |
| -20 | PR | 1 | - | - | - | - | 10 m | 14.1°C  (<13.4->14.9°C) | >3 ml/L | 2007 | 90 T nm-2 | Hydroacoustic | IF | 34 |
| -21 | PR | 0 | - | - | - | - | - | - | - | 2007 | 0 | Hydroacoustic | IF | 34 |
| -22 | PR | 0 | - | - | - | - | - | - | - | 2007 | 0 | Hydroacoustic | IF | 34 |
| -23 | PR | 0 | - | - | - | - | - | - | - | 2007 | 0 | Hydroacoustic | IF | 34 |
| -24 | PR | 0 | - | - | - | - | - | - | - | 2007 | 0 | Hydroacoustic | IF | 34 |
| -25 | PR | 0 | - | - | - | - | - | - | - | 2007 | 0 | Hydroacoustic | IF | 34 |
| -26 | PR | 0 | - | - | - | - | - | - | - | 2007 | 0 | Hydroacoustic | IF | 34 |
| -27 | PR | 0 | - | - | - | - | - | - | - | 2007 | 0 | Hydroacoustic | IF | 34 |
| -28 | PR | 0 | - | - | - | - | - | - | - | 2007 | 0 | Hydroacoustic | IF | 34 |
| -29 | PR | 0 | - | - | - | - | - | - | - | 2007 | 0 | Hydroacoustic | IF | 34 |
| -30 | PR | 0 | - | - | - | - | - | - | - | 2007 | 0 | Hydroacoustic | IF | 34 |
| -31 | PR | 0 | - | - | - | - | - | - | - | 2007 | 0 | Hydroacoustic | IF | 34 |
| -32 | PR | 0 | - | - | - | - | - | - | - | 2007 | 0 | Hydroacoustic | IF | 34 |
| -33 | AN-SA | 0 | - | - | - | - | 0-100 m | S: 12°C  50m: 11°C | - | 2005 | 0 | Pelagic net (Calvet) | IF | 34 |
| -34 | AN-SA | 0 | - | - | - | - | 0-100 m | S: 12°C  50m: 11°C | - | 2005 | 0 | Pelagic net (Calvet) | IF | 35 |
| -35 | AN-SA | 0 | - | - | - | - | 0-100 m | S: 11-12°C  50m: 11°C | - | 2005 | 0 | Pelagic net (Calvet) | IF | 35 |
| -36 | AN-SA | 0 | - | - | - | - | 0-100 m | S: 12°C  50m: 11°C | - | 2005 | 0 | Pelagic net (Calvet) | IF | 35 |
| -37 | AN-SA | 0 | - | - | - | - | 0-100 m | S: 13-14°C  50m: 12°C | - | 2005 | 0 | Pelagic net (Calvet) | IF | 35 |
| -38 | AN-SA | 0 | - | - | - | - | 0-100 m | S: 13°C  50m: 12°C | - | 2005 | 0 | Pelagic net (Calvet) | IF | 35 |
| -39 | AN-SA | 0 | - | - | - | - | 0-100 m | S: 12°C  50m: 11°C | - | 2005 | 0 | Pelagic net (Calvet) | IF | 35 |
| -40 | AN-SA | 0 | - | - | - | - | 0-100 m | S: 12°C  50m: 11°C | - | 2005 | 0 | Pelagic net (Calvet) | IF | 35 |
| -41 | AN-SA | 0 | - | - | - | - | 0-100 m | S: 12°C  50m: 11°C | - | 2005 | 0 | Pelagic net (Calvet) | IF | 35 |
| -21 | PM-Cj-B | - | 0 | - | - | - | 50-400 m | - | - | 2001 | 0 | demersal trawl | IF | 36 |
| -22 | PM-Cj-B | - | 0 | - | - | - | 50-400 m | - | - | 2001 | 0 | demersal trawl | IF | 36 |
| -23 | PM-Cj-B | - | 0 | - | - | - | 50-400 m | - | - | 2001 | 0 | demersal trawl | IF | 36 |
| -24 | PM-Cj-B | - | 1 | 16 | 43 | - | 50-400 m | - | - | 2001 | 7,412 ton | demersal trawl | IF | 36 |
| -25 | PM-Cj-B | - | 1 | - | 50-400 m | - | - | 2001 | demersal trawl | IF | 36 |
| -26 | PM-Cj-B | - | 1 | 12 | 51 | - | 50-400 m | - | - | 2001 | 18,203 ton | demersal trawl | IF | 36 |
| -27 | PM-Cj-B | - | 1 | - | 50-400 m | - | - | 2001 | demersal trawl | IF | 36 |
| -28 | PM-Cj-B | - | 1 | - | 50-400 m | - | - | 2001 | demersal trawl | IF | 36 |
| -29 | PM-Cj-B | - | 1 | - | 50-400 m | - | - | 2001 | demersal trawl | IF | 36 |
| -30 | PM-Cj-B | - | 1 | 12 | 35 | - | 50-400 m | - | - | 2001 | 216 ton | demersal trawl | IF | 36 |
| -31 | PM-Cj-B | - | 0 | 14 | 31 | - | 50-400 m | - | - | 2001 | 0 | demersal trawl | IF | 36 |
| -32 | PM-Cj-B | - | 1 | 23 | 33 | - | 50-400 m | - | - | 2001 | 71 kg | demersal trawl | IF | 36 |
| -33 | PM-Cj-B | - | 1 | - | 50-400 m | - | - | 2001 | demersal trawl | IF | 36 |
| -34 | PM-Cj-B | - | 0 | 16 | 42 | - | 50-400 m | - | - | 2001 | 0 | demersal trawl | IF | 36 |
| -35 | PM-Cj-B | - | 0 | 12 | 35 | - | 50-400 m | - | - | 2001 | 0 | demersal trawl | IF | 36 |
| -36 | PM-Cj-B | - | 1 | 10 | 45 | - | 50-400 m | - | - | 2001 | 8,866 Ton | demersal trawl | IF | 36 |
| -37 | PM-Cj-B | - | 1 | 10 | 45 | - | 50-400 m | - | - | 2001 | 5,760 ton | demersal trawl | IF | 36 |
| -23 | PM-Cj-B | - | 0 | - | - | - | 50-450 m | - | - | 2003 | 0 | demersal trawl | IF | 37 |
| -24 | PM-Cj-B | - | 1 | 16 | 41 | - | 50-450 m | - | - | 2003 | 4,604 Ton  13.59 Ton km-2 | demersal trawl | IF | 37 |
| -25 | PM-Cj-B | - | 1 | 20 | 46 | - | 50-450 m | - | - | 2003 | 931 Ton  22.68 Ton Km-2 | demersal trawl | IF | 37 |
| -26 | PM-Cj-B | - | 1 | 17 | 45 | - | 50-450 m | NA | NA | 2003 | 4,231 Ton  6.91 Ton Km-2 | demersal trawl | IF | 37 |
| -27 | PM-Cj-B | - | 1 | 17 | 45 | - | 50-450 m | NA | NA | 2003 | 2,055 Ton | demersal trawl | IF | 37 |
| -28 | PM-Cj-B | - | 0 | - | - | - | 50-450 m | NA | NA | 2003 | 0 | demersal trawl | IF | 37 |
| -29 | PM-Cj-B | - | 1 | 13 | 40 | - | 50-450 m | NA | NA | 2003 | 1,108 Ton  6.59 Ton Km-2 | demersal trawl | IF | 37 |
| -30 | PM-Cj-B | - | 1 | - | 50-450 m | NA | NA | 2003 | demersal trawl | IF | 37 |
| -31 | PM-Cj-B | - | 0 | - | - | - | 50-450 m | NA | NA | 2003 | 0 | demersal trawl | IF | 37 |
| -32 | PM-Cj-B | - | 0 | - | - | - | 50-450 m | NA | NA | 2003 | 0 | demersal trawl | IF | 37 |
| -33 | PM-Cj-B | - | 0 | - | - | - | 50-450 m | NA | NA | 2003 | 0 | demersal trawl | IF | 37 |
| -34 | PM-Cj-B | - | 0 | - | - | - | 50-450 m | NA | NA | 2003 | 0 | demersal trawl | IF | 37 |
| -35 | PM-Cj-B | - | 0 | - | - | - | 50-450 m | NA | NA | 2003 | 0 | demersal trawl | IF | 37 |
| -36 | PM-Cj-B | - | 1 | 10 | 43 | 25 | 50-450 m | NA | NA | 2003 | 3,680 Ton  21,52 Ton Km-2 | demersal trawl | IF | 37 |
| -37 | PM-Cj-B | - | 1 | 25 | 50-450 m | NA | NA | 2003 | 524 Ton  5.82 Ton Km-2 | demersal trawl | IF | 37 |
| -24 | PM-Cj-B | - | 0 | - | - | - | 80-580 m | NA | NA | 2004 | 0 | demersal trawl | IF | 38 |
| -25 | PM-Cj-B | - | 1 | 18 | 43 | - | 80-580 m | NA | NA | 2004 | 502.3 Ton | demersal trawl | IF | 38 |
| -26 | PM-Cj-B | - | 1 | 18 | 39 | - | 80-580 m | NA | NA | 2004 | 910.36 Ton | demersal trawl | IF | 38 |
| -27 | PM-Cj-B | - | 1 | - | 80-580 m | NA | NA | 2004 | demersal trawl | IF | 38 |
| -28 | PM-Cj-B | - | 1 | - | 80-580 m | NA | NA | 2004 | demersal trawl | IF | 38 |
| -29 | PM-Cj-B | - | 0 | - | - | - | 80-580 m | NA | NA | 2004 | 0 | demersal trawl | IF | 38 |
| -30 | PM-Cj-B | - | 1 | 11 | 43 | - | 80-580 m | NA | NA | 2004 | 3,677.5 Ton | demersal trawl | IF | 38 |
| -31 | PM-Cj-B | - | 0 | - | - | - | 80-580 m | NA | NA | 2004 | 0 | demersal trawl | IF | 38 |
| -32 | PM-Cj-B | - | 0 | - | - | - | 80-580 m | NA | NA | 2004 | 0 | demersal trawl | IF | 38 |
| -33 | PM-Cj-B | - | 0 | - | - | - | 80-580 m | NA | NA | 2004 | 0 | demersal trawl | IF | 38 |
| -34 | PM-Cj-B | - | 0 | - | - | - | 80-580 m | NA | NA | 2004 | 0 | demersal trawl | IF | 38 |
| -35 | PM-Cj-B | - | 0 | - | - | - | 80-580 m | NA | NA | 2004 | 0 | demersal trawl | IF | 38 |
| -36 | PM-Cj-B | - | 1 | 10 | 38 | - | 80-580 m | NA | NA | 2004 | 9,416.6 Ton | demersal trawl | IF | 38 |
| -37 | PM-Cj-B | - | 1 | - | 80-580 m | NA | NA | 2004 | demersal trawl | IF | 38 |
| -7 | PM-BP | 1 | 0 | - | - | - | - | - | - | 2004 & 2006 | - | - | P | 39 |
| -19 | PM-BP | 1 | 0 | - | - | - | - | - | - | 2004 & 2006 | - | - | P | 39 |
| -24 | PM-BP | 0 | 1 | - | - | - | - | - | - | 2004 & 2006 | - | - | P | 39 |
| -25 | PM-BP | 0 | 1 | - | - | - | - | - | - | 2004 & 2006 | - | - | P | 39 |
| -26 | PM-BP | 0 | 1 | - | - | - | - | - | - | 2004 & 2006 | - | - | P | 39 |
| -29 | PM-BP | 0 | 1 | - | - | - | - | - | - | 2004 & 2006 | - | - | P | 39 |
| -34 | PM-BP | 0 | 1 | - | - | - | - | - | - | 2004 & 2006 | - | - | P | 39 |
| -18 | AN | 1 | 0 | - | - | - | - | >15.5°C | >1.6mlL-1 | 2013 | Presence | Pelagic mid-water trawl | IF | 40 |
| -19 | AN | 1 | 0 | - | - | - | - | >15.5°C | >1.6mlL-1 | 2013 | Presence | Pelagic mid-water trawl | IF | 40 |
| -3 | H | - | 0 | - | - | - | - | S: 24°C  B: 10°C | B: 0.5-1.34 ml L-1 | 2014 | 0 | demersal trawl | II | 41 |
| -4 | H | - | 0 | - | - | - | - | S: 24°C  B: 10°C | B: 0.5-1.34 ml L-1 | 2014 | 0 | demersal trawl | II | 41 |
| -5 | H | - | 0 | - | - | - | - | S: 24°C  B: 10°C | B: 0.5-1.34 ml L-1 | 2014 | 0 | demersal trawl | II | 41 |
| -6 | H | - | 0 | - | - | - | - | S:23°C  B: 10°C | B: 0.5-1.34 ml L-1 | 2014 | 0 | demersal trawl | II | 41 |
| -7 | H | - | 0 | 18 | 34 | - | 100 m- | S: 23°C  B: 10°C | B: 0.5-1.34 ml L-1 | 2014 | 16.96 kg | demersal trawl | II | 41 |
| -8 | H | - | 0 | 17 | 30 | - | 100 m | S: 22°C  B: 20°C | B: 0.5-1.34 ml L-1 | 2014 | demersal trawl | II | 41 |
| -9 | H | - | 1 | 11 | 28 |  | 100 m | S: 23°C  B: 12°C | B:3-4 ml L-1 | 2014 | demersal trawl | II | 41 |
| -10 | H | - | 0 | - | - | - | - | S: 22°C  B: 14-16°C | B: 0.5-1.34 ml L-1 | 2014 | 0 | demersal trawl | II | 41 |
| -11 | H | - | 0 | - | - | - | - | S: 22°C  B: 14-16°C | B: 0.5-1.34 ml L-1 | 2014 | 0 | demersal trawl | II | 41 |
| -12 | H | - | 0 | - | - | - | - | S: 22°C  B: 14-16°C | B: 0.5-1.34 ml L-1 | 2014 | 0 | demersal trawl | II | 41 |
| -13 | H | - | 0 | - | - | - | - | S: 22°C  B: 14-16°C | B: 0.5-1.34 ml L-1 | 2014 | 0 | demersal trawl | II | 41 |
| -14 | H | - | 0 | - | - | - | - | S: 22°C  B: 14-16°C | B: 0.5-1.34 ml L-1 | 2014 | 0 | demersal trawl | II | 41 |
| -3 | B-Cr | - | 0 | - | - | - | 40-400m | S: 14-22°C | S: 5-6 ml L-1 | 1970 | 0 | demersal trawl (Agassiz and Engel) | II | 42 |
| -4 | B-Cr | - | 0 | - | - | - | 17-100 m | S: 14-21°C | S: 6 ml L-1 | 1970 | 0 | demersal trawl (Agassiz and Engel) | II | 42 |
| -5 | B-Cr | - | 0 | - | - | - | 140-180 m | S:14-15°C | S: 6 ml L-1 | 1970 | 0 | demersal trawl (Agassiz and Engel) | II | 42 |
| -8 | PM-P | 1 | - | - | - | - | 0-12 m | 16-23 °C | - | 1996 | 4458 Ton | Hydroacoustic  & pelagic trawl | II | 43 |
| -9 | PM-P | 1 | - | - | - | - | 0-12 m | - | 1996 | 12030 Ton | Hydroacoustic  & pelagic trawl | II | 43 |
| -10 | PM-P | 1 | - | - | - | - | 0-12 m | - | 1996 | 3693 Ton | Hydroacoustic  & pelagic trawl | II | 43 |
| -11 | PM-P | 1 | - | - | - | - | 0-12 m | - | 1996 | 11778 Ton | Hydroacoustic  & pelagic trawl | II | 43 |
| -12 | PM-P | 1 | - | - | - | - | 0-12 m | - | 1996 | 8675 Ton | Hydroacoustic  & pelagic trawl | II | 43 |
| -13 | PM-P | 1 | - | - | - | - | 0-12 m | 16-23 °C | - | 1996 | NA | Hydroacoustic  & pelagic trawl | II | 43 |
| -14 | PM-P | 1 | - | - | - | - | - | 1996 | 2307 Ton | Hydroacoustic  & pelagic trawl | II | 43 |
| -15 | PM-P | 1 | - | - | - | - | - | 1996 | 6251 Ton | Hydroacoustic  & pelagic trawl | II | 43 |
| -16 | PM-P | 1 | - | - | - | - | - | 1996 | 11843 Ton | Hydroacoustic  & pelagic trawl | II | 43 |
| -17 | PM-P | 1 | - | - | - | - | - | 1996 | 2667 Ton | Hydroacoustic  & pelagic trawl | II | 43 |
| -18 | PM-P | 1 | - | - | - | - | - | 1996 | NA | Hydroacoustic  & pelagic trawl | II | 43 |
| -3 | BP-R | - | 0 |  |  |  |  | NA | - | 1995 | 0 | demersal trawl | II | 44 |
| -4 | BP-R | - | 0 |  |  |  |  | NA | - | 1995 | 0 | demersal trawl | II | 44 |
| -5 | BP-R | 0 | 0 |  |  |  |  | NA | - | 1995 | 0 | Pelagic trawl/ demersal trawl | II | 44 |
| -6 | BP-R | 0 | 0 |  |  |  |  | NA | - | 1995 | 0 | Pelagic trawl/ demersal trawl | II | 44 |
| -7 | BP-R | 0 | 0 |  |  |  |  | NA | - | 1995 | 0 | Pelagic trawl/ demersal trawl | II | 44 |
| -8 | BP-R | 0 | 0 |  |  |  |  | NA | - | 1995 | 0 | Pelagic trawl/ demersal trawl | II | 44 |
| -11 | BP-R | 0 | - | - | - | - | - | NA | - | 1995 | 0 | Pelagic trawl | II | 44 |
| -12 | BP-R | 1 | - | - | - | - | - | 16-23°C | - | 1995 | 0 | Pelagic trawl | II | 44 |
| -13 | BP-R | 1 | - | - | - | - | - | 16-23°C | - | 1995 | 350 kg | Pelagic trawl | II | 44 |
| -14 | BP-R | 1 | - | - | - | - | - | 16-23°C | - | 1995 | 351 kg | Pelagic trawl | II | 44 |
| -15 | BP-R | 1 | - | - | - | - | - | 16-23°C | - | 1995 | 700 kg | Pelagic trawl | II | 44 |
| -16 | BP-R | 1 | - | - | - | - | - | 16-23°C | - | 1995 | Presence | Pelagic trawl | II | 44 |
| -17 | BP-R | 1 | - | - | - | - | - | 16-23°C | - | 1995 | 37.9 kg | Pelagic trawl | II | 44 |
| -18 | BP-R | 1 | - | - | - | - | - | 16-23°C | - | 1995 | 0.5 kg | Pelagic trawl | II | 44 |
| -3 | BP-R | - | 0 | - | - | - | - | - | - | 1996 | 0 | demersal trawl (Granton) | II | 45 |
| -4 | BP-R | 0 | 0 | - | - | - | - | - | - | 1996 | 0 | Hydroacoustic and Pelagic trawl/demersal trawl (Granton) | II | 45 |
| -5 | BP-R | 0 | 0 | - | - | - | - | - | - | 1996 | 0 | Hydroacoustic and Pelagic trawl/demersal trawl (Granton) | II | 45 |
| -6 | BP-R | 0 | 1 | - | - | - | 90 m | - | - | 1996 | 05 kg (benthic) | Hydroacoustic and Pelagic trawl/demersal trawl (Granton) | II | 45 |
| -7 | BP-R | 1 | 1 | - | - | - | 71 m | - | - | 1996 | 0.08 kg (pelagic)  05 kg (benthic) | Hydroacoustic and Pelagic trawl/demersal trawl (Granton) | II | 45 |
| -8 | BP-R | 0 | - | - | - | - | - | - | - | 1996 | 0 | Hydroacoustic and Pelagic trawl | II | 45 |
| -9 | BP-R | 1 | - | - | - | - | - | - | - | 1996 | 4 kg | Hydroacoustic and Pelagic trawl | II | 45 |
| -10 | BP-R | 1 | - | - | - | - | - | - | - | 1996 | 4.6 kg | Hydroacoustic and Pelagic trawl | II | 45 |
| -11 | BP-R | 1 | - | - | - | - | - | - | - | 1996 | 11 kg | Hydroacoustic and Pelagic trawl | II | 45 |
| -12 | BP-R | 1 | - | - | - | - | - | - | - | 1996 | presence | Hydroacoustic and Pelagic trawl | II | 45 |
| -3 | H | G | 0 | - | - | - | - | - | - | 2000 | 0 | Demersal trawl | II | 46 |
| -4 | H | - | 0 | - | - | - | - | - | - | 2000 | 0 | Demersal trawl | II | 46 |
| -5 | H | - | 0 | - | - | - | - | - | - | 2000 | 0 | Demersal trawl | II | 46 |
| -6 | H | - | 0 | - | - | - | - | - | - | 2000 | 0 | Demersal trawl | II | 46 |
| -7 | H | - | 1 | - | - | - | 216 m | - | - | 2000 | 2 kg | Demersal trawl | II | 46 |
| -8 | H | - | 0 | - | - | - | - | - | - | 2000 | 0 | Demersal trawl | II | 46 |
| -9 | H | - | 1 | - | - | - | 160 m | - | - | 2000 | 0.02 kg | Demersal trawl | II | 46 |
| -3 | H | - | 0 | - | - | - | - | - | - | 2003 | 0 | Demersal trawl | II | 47 |
| -4 | H | - | 0 | - | - | - | - | - | - | 2003 | 0 | Demersal trawl | II | 47 |
| -5 | H | - | 0 | - | - | - | - | - | - | 2003 | 0 | Demersal trawl | II | 47 |
| -6 | H | - | 0 | - | - | - | - | - | - | 2003 | 0 | Demersal trawl | II | 47 |
| -7 | H | - | 1 | - | - | - | 100-200 m | - | - | 2003 | 28.28 Kg | Demersal trawl | II | 47 |
| -8 | H | - | 0 | - | - | - | - | - | - | 2003 | 0 | Demersal trawl | II | 47 |
| -3 | H |  | 0 | - | - | - | - | - | - | 2004 | 0 | Demersal trawl | II | 48 |
| -4 | H |  | 0 | - | - | - | - | - | - | 2004 | 0 | Demersal trawl | II | 48 |
| -5 | H |  | 0 | - | - | - | - | - | - | 2004 | 0 | Demersal trawl | II | 48 |
| -6 | H |  | 0 | - | - | - | - | - | - | 2004 | 0 | Demersal trawl | II | 48 |
| -7 | H |  | 1 | - | - | - | - | - | 1-2 ml L-1 | 2004 | 127.54 Kg | Demersal trawl | II | 48 |
| -12 | AN | 1 | - | - | - | - | - | - | - | 2004 | 0 | Pelagic trawls and Acoustic records | P | 49 |
| -13 | AN | 1 | - | - | - | - | - | - | - | 2004 | 0 | Pelagic trawls and Acoustic records | P | 49 |
| -4 | AN | 1 | - | 8 | 22.9 | - | - | - | - | 2008-2011 | Anchovy stomach contents | Pelagic mid-water trawl | T | 50 |
| -5 | AN | 1 | - | - | - | - | - | 2008-2011 | Anchovy stomach contents | Pelagic mid-water trawl | T | 50 |
| -6 | AN | 1 | - | - | - | - | - | 2008-2011 | Anchovy stomach contents | Pelagic mid-water trawl | T | 50 |
| -7 | AN | 1 | - | - | - | - | - | 2008-2011 | Anchovy stomach contents | Pelagic mid-water trawl | T | 50 |
| -8 | AN | 1 | - | - | - | - | - | 2008-2011 | Anchovy stomach contents | Pelagic mid-water trawl | T | 50 |
| -9 | AN | 1 | - | - | - | - | - | 2008-2011 | Anchovy stomach contents | Pelagic mid-water trawl | T | 50 |
| -10 | AN | 1 | - | - | - | - | - | 2008-2011 | Anchovy stomach contents | Pelagic mid-water trawl | T | 50 |
| -11 | AN | 1 | - | - | - | - | - | 2008-2011 | Anchovy stomach contents | Pelagic mid-water trawl | T | 50 |
| -12 | AN | 1 | - | - | - | - | - | 2008-2011 | Anchovy stomach contents | Pelagic mid-water trawl | T | 50 |
| -3 | H | - | 0 | - | - | - | - | - | - | 2004 | 0 | Agassiz trawl | II | 51 |
| -4 | H | - | 0 | - | - | - | - | - | - | 2004 | 0 | Agassiz trawl | II | 51 |
| -5 | H | - | 0 | - | - | - | - | - | - | 2004 | 0 | Agassiz trawl | II | 51 |
| -6 | H | - | 0 | - | - | - | - | - | - | 2004 | 0 | Agassiz trawl | II | 51 |
| -7 | H | - | 1 | 14 | 39 | 24.7 | - | Cool coastal waters (<22°C) | NA | 2004 | NA | Agassiz trawl | II | 51 |
| -8 | H | - | 1 |  | NA | 2004 | NA | Agassiz trawl | II | 51 |
| -6 | B-Cr | - | 0 | - | - | - | - | - | - | 1971 | 0 | Demersal trawl | II | 52 |
| -7 | B-Cr | - | 0 | - | - | - | - | - | - | 1971 | 0 | Demersal trawl | II | 52 |
| -8 | B-Cr | - | 0 | - | - | - | - | - | - | 1971 | 0 | Demersal trawl | II | 52 |
| -9 | B-Cr | - | 0 | - | - | - | - | - | - | 1971 | 0 | Demersal trawl | II | 52 |
| -10 | B-Cr | - | 0 | - | - | - | - | - | - | 1971 | 0 | Demersal trawl | II | 52 |
| -11 | B-Cr | - | 0 | - | - | - | - | - | - | 1971 | 0 | Demersal trawl | II | 52 |
| -10 | B-Cr | - | 0 | - | - | - | - | - | - | 1971 | 0 | Demersal trawl | II | 52 |
| -12 | B-Cr | - | 0 | - | - | - | - | - | - | 1972 | 0 | Agassiz trawl | II | 53 |
| -14 | B-Cr | - | 0 | - | - | - | - | - | - | 1972 | 0 | Agassiz trawl | II | 53 |
| -16 | B-Cr | - | 1 | NA | NA | NA | 40 m | NA | NA | 1972 | Presence | Agassiz trawl | II | 53 |
| -17 | B-Cr | - | 0 | - | - | - | - | - | - | 1972 | 0 | Agassiz trawl | II | 53 |
| -18 | B-Cr | - | 0 | - | - | - | - | - | - | 1972 | 0 | Agassiz trawl | II | 53 |
| -11 | MB-F | - | 1 | - | - | - | 3.5-22 m | cool coastal waters  14.8-15.4°C | B: 1.90 ml L-1 | 2002 | Presence | Diving | II | 54 |
| -12 | PM-P | 1 | - | 11 | 28 | - | 10 m | 16-<23°C | - | 1996 | 1,200 kg/h | Pelagic mid-water trawl | II | 55 |
| -8 | PR | 1 | - | - | - | - | - | - | - | 1998 | 4,926 Ton | Hydroacoustic | II | 56 |
| -9 | PR | 1 | - | - | - | - | - | - | - | 1998 | 2,289 Ton | Hydroacoustic | II | 56 |
| -10 | PR | 0 | - | - | - | - | - | - | - | 1998 | 0 | Hydroacoustic | II | 56 |
| -11 | PR | 1 | - | - | - | - | - | - | - | 1998 | 41,311 Ton | Hydroacoustic | II | 56 |
| -12 | PR | 1 | - | - | - | - | - | - | - | 1998 | 28,742 Ton | Hydroacoustic | II | 56 |
| -13 | PR | 1 | - | - | - | - | - | - | - | 1998 | 265,258 Ton | Hydroacoustic | II | 56 |
| -14 | PR | 1 | - | - | - | - | - | - | - | 1998 | 154,287 Ton | Hydroacoustic | II | 56 |
| -15 | PR | 1 | - | - | - | - | - | - | - | 1998 | 42,958 Ton | Hydroacoustic | II | 56 |
| -16 | PR | 1 | - | - | - | - | - | - | - | 1998 | 172,188 Ton | Hydroacoustic | II | 56 |
| -17 | PR | 1 | - | - | - | - | - | - | - | 1998 | 57,397 Ton | Hydroacoustic | II | 56 |
| -18 | PR | 1 | - | - | - | - | - | - | - | 1998 | 200,017 Ton | Hydroacoustic | II | 56 |
| -4 | Pelagic | 1 | - | - | - | - | - | - | - | 2001 | Presence | Pelagic mid-water trawl | II | 57 |
| -5 | Pelagic | 1 | - | - | - | - | - | - | - | 2001 | Presence | Pelagic mid-water trawl | II | 57 |
| -6 | Pelagic | 1 | - | - | - | - | - | - | - | 2001 | 1-10,000 Ton | Pelagic mid-water trawl | II | 57 |
| -7 | Pelagic | 1 | - | - | - | - | - | - | - | 2001 | 1-50,000 Ton | Pelagic mid-water trawl | II | 57 |
| -8 | Pelagic | 1 | - | - | - | - | - | - | - | 2001 | 224,142 Ton | Pelagic mid-water trawl | II | 57 |
| -9 | Pelagic | 1 | - | - | - | - | - | - | - | 2001 | 1,014,523 Ton | Pelagic mid-water trawl | II | 57 |
| -10 | Pelagic | 1 | - | - | - | - | - | - | - | 2001 | 1-900,000 Ton | Pelagic mid-water trawl | II | 57 |
| -11 | Pelagic | 1 | - | - | - | - | - | - | - | 2001 | 1-900,000 Ton | Pelagic mid-water trawl | II | 57 |
| -12 | Pelagic | 1 | - | - | - | - | - | - | - | 2001 | 1-900,000 Ton | Pelagic mid-water trawl | II | 57 |
| -13 | Pelagic | 1 | - | - | - | - | - | - | - | 2001 | 1-900,000 Ton | Pelagic mid-water trawl | II | 57 |
| -14 | Pelagic | 1 | - | - | - | - | - | - | - | 2001 | 1-900,000 Ton | Pelagic mid-water trawl | II | 57 |
| -15 | Pelagic | 0 | - | - | - | - | - | - | - | 2001 | 0 | Pelagic mid-water trawl | II | 57 |
| -16 | Pelagic | 1 | - | - | - | - | - | - | - | 2001 | 2,026 Ton | Pelagic mid-water trawl | II | 57 |
| -17 | Pelagic | 0 | - | - | - | - | - | - | - | 2001 | 0 | Pelagic mid-water trawl | II | 57 |
| -18 | Pelagic | 1 | - | - | - | - | - | - | - | 2001 | 30,000 Ton | Pelagic mid-water trawl | II | 57 |
| -3 | Pelagic | 0 | - | - | - | - | - | - | - | 2015 | 0 | Hydroacoustic | II | 58 |
| -4 | Pelagic | 0 | - | - | - | - | - | - | - | 2015 | 0 | Hydroacoustic | II | 58 |
| -5 | Pelagic | 0 | - | - | - | - | - | - | - | 2015 | 0 | Hydroacoustic | II | 58 |
| -6 | Pelagic | 1 | - | 6 | 10.5 | 7.8 | - | - | - | 2015 | 1,385 Ton | Hydroacoustic | II | 58 |
| -7 | Pelagic | 0 | - |  |  |  | - | - | - | 2015 | 0 | Hydroacoustic | II | 58 |
| -8 | Pelagic | 1 | - | 8 | 14.5 | 10.9 | - | - | - | 2015 | 88,089 Ton | Hydroacoustic | II | 58 |
| -9 | Pelagic | 1 | - | 8 | 15 | 11.8 | - | - | - | 2015 | 734,199 Ton | Hydroacoustic | II | 58 |
| -10 | Pelagic | 1 | - | 9 | 19 | 1308 | - | - | - | 2015 | 91,262 Ton | Hydroacoustic | II | 58 |
| -11 | Pelagic | 1 | - | 6.5 | 19 | 10.4 | - | - | - | 2015 | 496,871 Ton | Hydroacoustic | II | 58 |
| -12 | Pelagic | 1 | - | 7 | 16 | 10.6 | - | - | - | 2015 | 280,954 Ton | Hydroacoustic | II | 58 |
| -13 | Pelagic | 1 | - | 7 | 17 | 10.9 | - | - | - | 2015 | 342,498 Ton | Hydroacoustic | II | 58 |
| -14 | Pelagic | 1 | - | 6 | 18 | 10.6 | - | - | - | 2015 | 117,701 Ton | Hydroacoustic | II | 58 |
| -15 | Pelagic | 1 | - | 6.5 | 16 | 10.6 | - | - | - | 2015 | 542,392 Ton | Hydroacoustic | II | 58 |
| -16 | Pelagic | 0 | - | - | - | - | - | - | - | 2015 | 0 | Hydroacoustic | II | 58 |
| -30 | Benthic |  | 1 | - | - | - | - | - | - | 1999 | >7.6 Ton Km-2 | Demersal trawl | IF | 59 |
| -29 | Benthic | - | 1 | - | - | - | - | - | - | 1999 | 0.17 Ton Km-2 | Demersal trawl | IF | 59 |
| -28 | Benthic | - | 1 | - | - | - | - | - | - | 1999 | 0.08-1.66 Ton Km-2 | Demersal trawl | IF | 59 |
| -27 | Benthic | - | 1 | - | - | - | - | - | - | 1999 | 2.03 Ton Km-2 | Demersal trawl | IF | 59 |
| -26 | Benthic | - | 1 | - | - | - | - | - | - | 1999 | 6.08 Ton/Km-2 | Demersal trawl | IF | 59 |
| -25 | Benthic | - | 1 | - | - | - | - | - | - | 1999 | 12.61 ton Km-2 | Demersal trawl | IF | 59 |
| -24 | Benthic | - | 1 | - | - | - | - | - | - | 1999 | 0.08-1.66 Ton Km-2 | Demersal trawl | IF | 59 |
| -23 | Benthic | - | 1 | - | - | - | - | - | - | 1999 | <0.08 Ton Km-2 | Demersal trawl | IF | 59 |
| -22 | Benthic | - | 0 | - | - | - | - | - | - | 1999 | 0 | Demersal trawl | IF | 59 |
| -21 | Benthic | - | 0 | - | - | - | - | - | - | 1999 | 0 | Demersal trawl | IF | 59 |
| -20 | Benthic | - | 0 | - | - | - | - | - | - | 1999 | 0 | Demersal trawl | IF | 59 |
| -19 | Benthic | - | 0 | - | - | - | - | - | - | 1999 | 0 | Demersal trawl | IF | 59 |
| -18 | Benthic | - | 0 | - | - | - | - | - | - | 1999 | 0 | Demersal trawl | IF | 59 |
| -18 | Pelagic | 1 | - | 11 | 17 | 14 | - | - | - | 1999 | NA | Pelagic trawl | IF | 59 |

**Table S2** Random Forest results

Model 1

Call:

randomForest(formula = Resp ~ ., data = d, importance = TRUE, keep.forest = FALSE, na.action = na.roughfix)

Type of random forest: classification

Number of trees: 500

No. of variables tried at each split: 2

OOB estimate of error rate: 9.09%

Confusion matrix:

1 2 3 class.error

1 17 0 0 0.00000000

2 0 12 1 0.07692308

3 0 2 1 0.66666667

print(importance(model1,type = 1,scale=TRUE))

MeanDecreaseAccuracy

AP 2.184894

t_2mlL 16.713073

t_1mlL 14.870008

t_0.5mlL 11.790145

d_2mlL 10.759189

d_1mlL 13.262663

d_0.5mlL 5.567395

Model 2

Call:

randomForest(formula = Resp ~ t_2mlL + t_1mlL + t_0.5mlL + d_2mlL + d_1mlL, data = d, importance = TRUE, na.action = na.roughfix)

Type of random forest: classification

Number of trees: 500

No. of variables tried at each split: 2

OOB estimate of error rate: 6.06%

Confusion matrix:

1 2 3 class.error

1 17 0 0 0.00000000

2 0 12 1 0.07692308

3 0 1 2 0.33333333

**Table S3**. Summary of results for Factorial Two-way ANOVA and Tukey *post-hoc* test on SDA parameters. Variables of feeding response in juveniles of *Pleuroncodes monodon* characteristics of postprandial metabolism (SDA response). **SMR** standard metabolic rate: mean metabolic rate at postabsortive and rest. **Peak SDA**: mean postprandial peak in metabolism, produced by the increase of oxygen consumption in response to feeding. **SDA scope**: Index corresponding to Peak SDA divides by SMR. **SDA duration**: time from feeding to SMR. **SDA (specific dynamic action)**: accumulated energy expended above SMR for duration SDA response.

| **ANOVA** |  | **SMR** | | | | **Peak SDA** | | | | **SDA** | | | | **SDA_Scope** | | | | **Time_SDA** | | | |
| --- | --- | --- | --- | --- | --- | --- | --- | --- | --- | --- | --- | --- | --- | --- | --- | --- | --- | --- | --- | --- | --- |
|  | **Df** | **Sum**  **Sq** | **Mean Sq** | **F value** | **Pr(>F)** | **Sum Sq** | **Mean Sq** | **F value** | **Pr(>F)** | **Sum Sq** | **Mean Sq** | **F value** | **Pr(>F)** | **Sum Sq** | **Mean Sq** | **F value** | **Pr(>F)** | **Sum Sq** | **Mean Sq** | **F value** | **Pr(>F)** | |
| **T°** | 2 | 0.159 | 0.079 | 325.2 | 4.7E-25 | 0.095 | 0.047 | 65.0 | 3.8E-13 | 0.997 | 0.499 | 102.1 | 3.2E-16 | 35.79 | 17.89 | 391.1 | 1.6E-26 | 480.77 | 240.39 | 3434.2 | 1.4E-44 | |
| **O2** | 3 | 0.106 | 0.035 | 144.8 | 3.5E-21 | 1.313 | 0.438 | 598.9 | 1.2E-32 | 25.084 | 8.361 | 1712.3 | 2E-41 | 21.62 | 7.21 | 157.5 | 7.8E-22 | 337.99 | 112.66 | 1609.5 | 6.7E-41 | |
| **T°:O2** | 6 | 0.096 | 0.016 | 65.43 | 8.1E-19 | 0.466 | 0.078 | 106.4 | 1.3E-22 | 0.115 | 0.019 | 3.9 | 0.004 | 6.82 | 1.1440537 | 24.9 | 6.7E-12 | 125.5 | 20.92 | 298.8 | 5.3E-31 | |
| **Residuals** | 39 | 0.010 | 0.000 |  |  | 0.029 | 0.001 |  |  | 0.190 | 0.005 |  |  | 1.78 | 0.05 |  |  | 2.73 | 0.07 |  |  | |
|  |  |  |  |  |  |  |  |  |  |  |  |  |  |  |  |  |  |  |  |  |  | |
| **Tukey** |  | **SMR** | | | | **Peak** | | | | **SDA** | | | | **SDA_Scope** | | | | **Time_SDA** | | | | |
|  |  | **diff** | **lwr** | **upr** | **p adj** | **diff** | **lwr** | **upr** | **p adj** | **diff** | **lwr** | **upr** | **p adj** | **diff** | **lwr** | **upr** | **p adj** | **diff** | **lwr** | **upr** | **p adj** | |
| 21ºC:1.4-21ºC:0.7 | | 0.030 | -0.008 | 0.068 | 0.256 | 0.185 | 0.119 | 0.251 | **0.000** | 0.060 | -0.112 | 0.232 | 0.985 | 1.493 | 0.967 | 2.018 | **0.000** | 2.500 | 1.850 | 3.150 | **0.000** | |
| 15ºC:0.7-21ºC:0.7 | | 0.036 | -0.003 | 0.074 | 0.087 | 0.203 | 0.136 | 0.269 | **0.000** | 0.110 | -0.062 | 0.282 | 0.542 | 1.570 | 1.045 | 2.095 | **0.000** | 8.080 | 7.430 | 8.730 | **0.000** | |
| 21ºC:2.9-21ºC:0.7 | | 0.149 | 0.113 | 0.185 | **0.000** | 0.420 | 0.357 | 0.483 | **0.000** | 0.158 | -0.005 | 0.321 | 0.064 | 1.708 | 1.210 | 2.206 | **0.000** | 3.130 | 2.514 | 3.746 | **0.000** | |
| 15ºC:1.4-21ºC:0.7 | | 0.067 | 0.030 | 0.103 | **0.000** | 0.298 | 0.235 | 0.361 | **0.000** | 0.242 | 0.079 | 0.405 | **0.000** | 1.870 | 1.372 | 2.368 | **0.000** | 4.852 | 4.236 | 5.468 | **0.000** | |
| 21ºC:8-21ºC:0.7 | | 0.275 | 0.237 | 0.313 | **0.000** | 0.803 | 0.736 | 0.869 | **0.000** | 1.635 | 1.463 | 1.807 | **0.000** | 2.195 | 1.670 | 2.720 | **0.000** | 10.200 | 9.550 | 10.850 | **0.000** | |
| 11ºC:0.7-21ºC:0.7 | | 0.028 | -0.013 | 0.070 | 0.445 | 0.150 | 0.078 | 0.222 | **0.000** | 0.237 | 0.051 | 0.422 | **0.004** | 2.263 | 1.696 | 2.831 | **0.000** | 12.585 | 1.883 | 13.287 | **0.000** | |
| 15ºC:2.9-21ºC:0.7 | | 0.058 | 0.019 | 0.096 | **0.000** | 0.360 | 0.294 | 0.426 | **0.000** | 0.228 | 0.056 | 0.399 | **0.002** | 2.418 | 1.892 | 2.943 | **0.000** | 5.403 | 4.753 | 6.052 | **0.000** | |
| 11ºC:1.4-21ºC:0.7 | | 0.032 | -0.006 | 0.071 | 0.173 | 0.151 | 0.084 | 0.217 | **0.000** | 0.270 | 0.098 | 0.442 | **0.000** | 2.458 | 1.932 | 2.983 | **0.000** | 11.700 | 1.050 | 12.350 | **0.000** | |
| 15ºC:8-21ºC:0.7 | | 0.098 | 0.059 | 0.136 | **0.000** | 0.508 | 0.441 | 0.574 | **0.000** | 1.720 | 1.548 | 1.892 | **0.000** | 2.603 | 2.077 | 3.128 | **0.000** | 12.075 | 1.425 | 12.725 | **0.000** | |
| 11ºC:8-21ºC:0.7 | | 0.003 | -0.033 | 0.039 | 1.000 | 0.350 | 0.287 | 0.413 | **0.000** | 2.004 | 1.841 | 2.167 | **0.000** | 3.632 | 3.134 | 4.130 | **0.000** | 13.950 | 3.334 | 14.566 | **0.000** | |
| 11ºC:2.9-21ºC:0.7 | | 0.027 | -0.009 | 0.063 | 0.326 | 0.314 | 0.251 | 0.377 | **0.000** | 0.294 | 0.131 | 0.457 | **0.000** | 4.590 | 4.092 | 5.088 | **0.000** | 7.984 | 7.368 | 8.600 | **0.000** | |
| 15ºC:0.7-21ºC:1.4 | | 0.006 | -0.033 | 0.044 | 1.000 | -0.018 | 0.049 | 0.084 | 0.999 | 0.050 | -0.122 | 0.222 | 0.996 | -0.078 | 0.448 | 0.603 | 1.000 | 5.580 | 4.930 | 6.230 | **0.000** | |
| 21ºC:2.9-21ºC:1.4 | | 0.119 | 0.083 | 0.155 | **0.000** | 0.235 | 0.172 | 0.298 | **0.000** | 0.098 | -0.065 | 0.261 | 0.632 | -0.216 | 0.283 | 0.714 | 0.931 | 0.630 | 0.014 | 1.246 | **0.041** | |
| 15ºC:1.4-21ºC:1.4 | | 0.037 | 0.000 | 0.073 | **0.047** | 0.113 | 0.050 | 0.176 | **0.000** | 0.182 | 0.019 | 0.345 | **0.017** | -0.378 | 0.121 | 0.876 | 0.298 | 2.352 | 1.736 | 2.968 | **0.000** | |
| 21ºC:8-21ºC:1.4 | | 0.245 | 0.207 | 0.283 | **0.000** | 0.618 | 0.551 | 0.684 | **0.000** | 1.575 | 1.403 | 1.747 | **0.000** | 0.703 | 0.177 | 1.228 | **0.002** | 7.700 | 7.050 | 8.350 | **0.000** | |
| 11ºC:0.7-21ºC:1.4 | | 0.058 | 0.017 | 0.100 | **0.001** | -0.035 | 0.037 | 0.107 | 0.860 | 0.177 | -0.009 | 0.362 | 0.074 | 0.771 | 0.204 | 1.338 | **0.002** | 10.085 | 9.383 | 10.787 | **0.000** | |
| 15ºC:2.9-21ºC:1.4 | | 0.028 | -0.011 | 0.066 | 0.375 | 0.175 | 0.109 | 0.241 | **0.000** | 0.168 | -0.004 | 0.339 | 0.061 | 0.925 | 0.400 | 1.450 | **0.000** | 2.903 | 2.253 | 3.552 | **0.000** | |
| 11ºC:1.4-21ºC:1.4 | | 0.062 | 0.024 | 0.101 | **0.000** | -0.034 | 0.032 | 0.101 | 0.812 | 0.210 | 0.038 | 0.382 | **0.006** | 0.965 | 0.440 | 1.490 | **0.000** | 9.200 | 8.550 | 9.850 | **0.000** | |
| 15ºC:8-21ºC:1.4 | | 0.068 | 0.029 | 0.106 | **0.000** | 0.323 | 0.256 | 0.389 | **0.000** | 1.660 | 1.488 | 1.832 | **0.000** | 1.110 | 0.585 | 1.635 | **0.000** | 9.575 | 8.925 | 10.225 | **0.000** | |
| 11ºC:8-21ºC:1.4 | | 0.027 | -0.009 | 0.063 | 0.326 | 0.165 | 0.102 | 0.228 | **0.000** | 1.944 | 1.781 | 2.107 | **0.000** | 2.140 | 1.641 | 2.638 | **0.000** | 11.450 | 0.834 | 12.066 | **0.000** | |
| 11ºC:2.9-21ºC:1.4 | | 0.057 | 0.021 | 0.093 | **0.000** | 0.129 | 0.066 | 0.192 | **0.000** | 0.234 | 0.071 | 0.397 | **0.001** | 3.098 | 2.599 | 3.596 | **0.000** | 5.484 | 4.868 | 6.100 | **0.000** | |
| 21ºC:2.9-15ºC:0.7 | | 0.113 | 0.077 | 0.150 | **0.000** | 0.218 | 0.155 | 0.280 | **0.000** | 0.048 | -0.115 | 0.211 | 0.996 | -0.138 | 0.360 | 0.636 | 0.998 | 4.950 | 4.334 | 5.566 | **0.000** | |
| 15ºC:1.4-15ºC:0.7 | | 0.031 | -0.006 | 0.067 | 0.165 | 0.096 | 0.033 | 0.159 | **0.000** | 0.132 | -0.031 | 0.295 | 0.213 | -0.300 | 0.198 | 0.798 | 0.632 | 3.228 | 2.612 | 3.844 | **0.000** | |
| 21ºC:8-15ºC:0.7 | | 0.239 | 0.201 | 0.278 | **0.000** | 0.600 | 0.534 | 0.666 | **0.000** | 1.525 | 1.353 | 1.697 | 0.**000** | 0.625 | 0.100 | 1.150 | **0.009** | 2.120 | 1.470 | 2.770 | **0.000** | |
| 11ºC:0.7-15ºC:0.7 | | 0.064 | 0.023 | 0.105 | **0.000** | -0.053 | 0.019 | 0.124 | 0.345 | 0.127 | -0.059 | 0.312 | 0.446 | 0.693 | 0.126 | 1.261 | **0.006** | 4.505 | 3.803 | 5.207 | **0.000** | |
| 15ºC:2.9-15ºC:0.7 | | 0.022 | -0.017 | 0.060 | 0.709 | 0.158 | 0.091 | 0.224 | **0.000** | 0.118 | -0.054 | 0.289 | 0.443 | 0.848 | 0.322 | 1.373 | **0.000** | 2.678 | 2.028 | 3.327 | **0.000** | |
| 11ºC:1.4-15ºC:0.7 | | 0.068 | 0.030 | 0.106 | **0.000** | -0.052 | 0.015 | 0.118 | 0.260 | 0.160 | -0.012 | 0.332 | 0.087 | 0.888 | 0.362 | 1.413 | **0.000** | 3.620 | 2.970 | 4.270 | **0.000** | |
| 15ºC:8-15ºC:0.7 | | 0.062 | 0.023 | 0.100 | **0.000** | 0.305 | 0.239 | 0.371 | **0.000** | 1.610 | 1.438 | 1.782 | **0.000** | 1.033 | 0.507 | 1.558 | **0.000** | 3.995 | 3.345 | 4.645 | **0.000** | |
| 11ºC:8-15ºC:0.7 | | 0.033 | -0.004 | 0.069 | 0.112 | 0.148 | 0.085 | 0.210 | **0.000** | 1.894 | 1.731 | 2.057 | **0.000** | 2.062 | 1.564 | 2.560 | **0.000** | 5.870 | 5.254 | 6.486 | **0.000** | |
| 11ºC:2.9-15ºC:0.7 | | 0.063 | 0.026 | 0.099 | **0.000** | 0.112 | 0.049 | 0.174 | **0.000** | 0.184 | 0.021 | 0.347 | **0.015** | 3.020 | 2.522 | 3.518 | **0.000** | -0.096 | 0.520 | 0.712 | 1.000 | |
| 15ºC:1.4-21ºC:2.9 | | 0.082 | 0.048 | 0.117 | **0.000** | 0.122 | 0.062 | 0.181 | **0.000** | 0.084 | -0.069 | 0.237 | 0.752 | -0.162 | 0.308 | 0.632 | 0.986 | 1.722 | 1.141 | 2.303 | **0.000** | |
| 21ºC:8-21ºC:2.9 | | 0.126 | 0.090 | 0.162 | **0.000** | 0.383 | 0.320 | 0.445 | **0.000** | 1.477 | 1.314 | 1.640 | **0.000** | -0.487 | 0.011 | 0.985 | 0.061 | 7.070 | 6.454 | 7.686 | **0.000** | |
| 11ºC:0.7-21ºC:2.9 | | 0.177 | 0.138 | 0.217 | **0.000** | 0.270 | 0.201 | 0.339 | **0.000** | 0.079 | -0.099 | 0.256 | 0.919 | 0.555 | 0.013 | 1.098 | **0.041** | 9.455 | 8.784 | 10.126 | **0.000** | |
| 15ºC:2.9-21ºC:2.9 | | 0.092 | 0.055 | 0.128 | **0.000** | -0.060 | 0.003 | 0.123 | 0.074 | 0.070 | -0.093 | 0.232 | 0.937 | 0.710 | 0.211 | 1.208 | **0.001** | 2.273 | 1.656 | 2.889 | **0.000** | |
| 11ºC:1.4-21ºC:2.9 | | 0.181 | 0.145 | 0.218 | **0.000** | 0.269 | 0.206 | 0.332 | **0.000** | 0.112 | -0.051 | 0.275 | 0.436 | 0.750 | 0.251 | 1.248 | **0.000** | 8.570 | 7.954 | 9.186 | **0.000** | |
| 15ºC:8-21ºC:2.9 | | 0.052 | 0.015 | 0.088 | **0.001** | 0.088 | 0.025 | 0.150 | **0.001** | 1.562 | 1.399 | 1.725 | **0.000** | 0.895 | 0.396 | 1.393 | **0.000** | 8.945 | 8.329 | 9.561 | **0.000** | |
| 11ºC:8-21ºC:2.9 | | 0.146 | 0.112 | 0.180 | **0.000** | 0.070 | 0.011 | 0.129 | **0.010** | 1.846 | 1.693 | 1.999 | **0.000** | 1.924 | 1.454 | 2.394 | **0.000** | 10.820 | 0.239 | 11.401 | **0.000** | |
| 11ºC:2.9-21ºC:2.9 | | 0.176 | 0.142 | 0.210 | **0.000** | 0.106 | 0.047 | 0.165 | **0.000** | 0.136 | -0.017 | 0.289 | 0.125 | 2.882 | 2.412 | 3.352 | **0.000** | 4.854 | 4.273 | 5.435 | **0.000** | |
| 21ºC:8-15ºC:1.4 | | 0.208 | 0.172 | 0.245 | **0.000** | 0.504 | 0.441 | 0.567 | **0.000** | 1.393 | 1.230 | 1.556 | **0.000** | -0.325 | 0.173 | 0.823 | 0.516 | 5.348 | 4.732 | 5.964 | **0.000** | |
| 11ºC:0.7-15ºC:1.4 | | 0.095 | 0.055 | 0.135 | **0.000** | 0.148 | 0.080 | 0.217 | **0.000** | 0.005 | -0.172 | 0.183 | 1.000 | -0.393 | 0.149 | 0.936 | 0.359 | 7.733 | 7.062 | 8.404 | **0.000** | |
| 15ºC:2.9-15ºC:1.4 | | 0.009 | -0.027 | 0.045 | 0.999 | -0.062 | 0.001 | 0.125 | 0.059 | 0.015 | -0.148 | 0.177 | 1.000 | 0.548 | 0.049 | 1.046 | **0.021** | -0.551 | 0.066 | 1.167 | 0.118 | |
| 11ºC:1.4-15ºC:1.4 | | 0.099 | 0.062 | 0.135 | **0.000** | 0.147 | 0.084 | 0.210 | **0.000** | 0.028 | -0.135 | 0.191 | 1.000 | 0.588 | 0.089 | 1.086 | **0.010** | 6.848 | 6.232 | 7.464 | **0.000** | |
| 15ºC:8-15ºC:1.4 | | 0.031 | -0.005 | 0.067 | 0.163 | 0.209 | 0.146 | 0.272 | **0.000** | 1.478 | 1.315 | 1.641 | **0.000** | 0.733 | 0.234 | 1.231 | **0.000** | 7.223 | 6.607 | 7.839 | **0.000** | |
| 11ºC:8-15ºC:1.4 | | 0.064 | 0.029 | 0.098 | **0.000** | -0.052 | 0.008 | 0.111 | 0.138 | 1.762 | 1.609 | 1.915 | **0.000** | 1.762 | 1.292 | 2.232 | **0.000** | 9.098 | 8.517 | 9.679 | **0.000** | |
| 11ºC:2.9-15ºC:1.4 | | 0.094 | 0.059 | 0.128 | **0.000** | -0.016 | 0.044 | 0.075 | 0.998 | 0.052 | -0.101 | 0.205 | 0.988 | 2.720 | 2.250 | 3.190 | **0.000** | 3.132 | 2.551 | 3.713 | **0.000** | |
| 11ºC:0.7-21ºC:8 | | 0.303 | 0.262 | 0.345 | **0.000** | 0.653 | 0.581 | 0.724 | **0.000** | 1.398 | 1.213 | 1.584 | **0.000** | -0.068 | 0.499 | 0.636 | 1.000 | 2.385 | 1.683 | 3.087 | **0.000** | |
| 21ºC:8-15ºC:2.9 | | 0.218 | 0.179 | 0.256 | **0.000** | 0.443 | 0.376 | 0.509 | **0.000** | 1.408 | 1.236 | 1.579 | **0.000** | -0.223 | 0.303 | 0.748 | 0.940 | 4.798 | 4.148 | 5.447 | **0.000** | |
| 11ºC:1.4-21ºC:8 | | 0.307 | 0.269 | 0.346 | **0.000** | 0.652 | 0.585 | 0.718 | **0.000** | 1.365 | 1.193 | 1.537 | **0.000** | -0.263 | 0.263 | 0.788 | 0.841 | 1.500 | 0.850 | 2.150 | **0.000** | |
| 15ºC:8-21ºC:8 | | 0.178 | 0.139 | 0.216 | **0.000** | 0.295 | 0.229 | 0.361 | **0.000** | 0.085 | -0.087 | 0.257 | 0.848 | -0.408 | 0.118 | 0.933 | 0.267 | 1.875 | 1.225 | 2.525 | **0.000** | |
| 11ºC:8-21ºC:8 | | 0.272 | 0.236 | 0.308 | **0.000** | 0.453 | 0.390 | 0.515 | **0.000** | 0.369 | 0.206 | 0.532 | **0.000** | 1.437 | 0.939 | 1.935 | **0.000** | 3.750 | 3.134 | 4.366 | **0.000** | |
| 21ºC:8-11ºC:2.9 | | 0.302 | 0.266 | 0.338 | **0.000** | 0.489 | 0.426 | 0.551 | **0.000** | 1.341 | 1.178 | 1.504 | **0.000** | 2.395 | 1.897 | 2.893 | **0.000** | 2.216 | 1.600 | 2.832 | **0.000** | |
| 11ºC:0.7-15ºC:2.9 | | 0.086 | 0.044 | 0.127 | **0.000** | 0.210 | 0.138 | 0.282 | **0.000** | 0.009 | -0.176 | 0.195 | 1.000 | -0.154 | 0.413 | 0.721 | 0.998 | 7.183 | 6.481 | 7.884 | **0.000** | |
| 11ºC:1.4-11ºC:0.7 | | 0.004 | -0.037 | 0.045 | 1.000 | -0.001 | 0.071 | 0.072 | 1.000 | 0.033 | -0.152 | 0.219 | 1.000 | -0.194 | 0.373 | 0.761 | 0.987 | 0.885 | 0.183 | 1.587 | **0.004** | |
| 15ºC:8-11ºC:0.7 | | 0.126 | 0.084 | 0.167 | **0.000** | 0.358 | 0.286 | 0.429 | **0.000** | 1.483 | 1.298 | 1.669 | **0.000** | -0.339 | 0.228 | 0.906 | 0.641 | -0.510 | 0.192 | 1.212 | 0.356 | |
| 11ºC:8-11ºC:0.7 | | 0.031 | -0.008 | 0.071 | 0.242 | 0.200 | 0.131 | 0.269 | **0.000** | 1.767 | 1.590 | 1.945 | **0.000** | 1.369 | 0.826 | 1.911 | **0.000** | 1.365 | 0.694 | 2.036 | **0.000** | |
| 11ºC:2.9-11ºC:0.7 | | 0.001 | -0.038 | 0.041 | 1.000 | 0.164 | 0.095 | 0.233 | **0.000** | 0.057 | -0.120 | 0.235 | 0.992 | 2.327 | 1.784 | 2.869 | **0.000** | 4.601 | 3.930 | 5.272 | **0.000** | |
| 11ºC:1.4-15ºC:2.9 | | 0.090 | 0.051 | 0.128 | **0.000** | 0.209 | 0.143 | 0.276 | **0.000** | 0.043 | -0.129 | 0.214 | 0.999 | -0.040 | 0.485 | 0.565 | 1.000 | 6.298 | 5.648 | 6.947 | **0.000** | |
| 15ºC:8-15ºC:2.9 | | 0.040 | 0.002 | 0.078 | **0.034** | 0.148 | 0.081 | 0.214 | **0.000** | 1.493 | 1.321 | 1.664 | **0.000** | -0.185 | 0.340 | 0.710 | 0.984 | 6.673 | 6.023 | 7.322 | **0.000** | |
| 11ºC:8-15ºC:2.9 | | 0.055 | 0.018 | 0.091 | **0.000** | -0.010 | 0.053 | 0.073 | 1.000 | 1.777 | 1.614 | 1.939 | **0.000** | 1.215 | 0.716 | 1.713 | **0.000** | 8.548 | 7.931 | 9.164 | **0.000** | |
| 11ºC:2.9-15ºC:2.9 | | 0.085 | 0.048 | 0.121 | **0.000** | -0.046 | 0.017 | 0.109 | 0.349 | 0.067 | -0.096 | 0.229 | 0.953 | 2.173 | 1.674 | 2.671 | **0.000** | 2.582 | 1.965 | 3.198 | **0.000** | |
| 15ºC:8-11ºC:1.4 | | 0.130 | 0.091 | 0.168 | **0.000** | 0.357 | 0.290 | 0.423 | **0.000** | 1.450 | 1.278 | 1.622 | **0.000** | -0.145 | 0.380 | 0.670 | 0.998 | -0.375 | 0.275 | 1.025 | 0.688 | |
| 11ºC:8-11ºC:1.4 | | 0.035 | -0.001 | 0.072 | 0.065 | 0.199 | 0.136 | 0.262 | **0.000** | 1.734 | 1.571 | 1.897 | **0.000** | 1.175 | 0.676 | 1.673 | **0.000** | 2.250 | 1.634 | 2.866 | **0.000** | |
| 11ºC:2.9-11ºC:1.4 | | 0.005 | -0.031 | 0.042 | 1.000 | 0.163 | 0.100 | 0.226 | **0.000** | 0.024 | -0.139 | 0.187 | 1.000 | 2.133 | 1.634 | 2.631 | **0.000** | 3.716 | 3.100 | 4.332 | **0.000** | |
| 11ºC:8-15ºC:8 | | 0.095 | 0.058 | 0.131 | **0.000** | 0.158 | 0.095 | 0.220 | **0.000** | 0.284 | 0.121 | 0.447 | **0.000** | 1.030 | 0.531 | 1.528 | **0.000** | 1.875 | 1.259 | 2.491 | **0.000** | |
| 15ºC:8-11ºC:2.9 | | 0.125 | 0.088 | 0.161 | **0.000** | 0.194 | 0.131 | 0.256 | **0.000** | 1.426 | 1.263 | 1.589 | **0.000** | 1.988 | 1.489 | 2.486 | **0.000** | 4.091 | 3.475 | 4.707 | **0.000** | |
| 11ºC:8-11ºC:2.9 | | 0.030 | -0.004 | 0.064 | 0.136 | -0.036 | 0.023 | 0.095 | 0.622 | 1.710 | 1.557 | 1.863 | **0.000** | 0.958 | 0.488 | 1.428 | **0.000** | 5.966 | 5.385 | 6.547 | **0.000** | |
|  |  |  |  |  |  |  |  |  |  |  |  |  |  |  |  |  |  |  |  |  |  | |

**REFERENCES S2**

1 Secor, S. M. (2009). Specific dynamic action: A review of the postprandial metabolic response. Journal of Comparative Physiology B: Biochemical, Systemic, and Environmental Physiology, 179(1), 1–56. https://doi.org/10.1007/s00360-008-0283-7

2 Yannicelli, B., Paschke, K., González, R. R., & Castro, L. R. (2013). Metabolic responses of the squat lobster (*Pleuroncodes monodon*) larvae to low oxygen concentration. Marine Biology, 160, 961-976. <https://doi.org/10.1007/s00227-012-2147-7>.

3 Gallardo, M., Rojas, I., Brokordt, K., Lovrich, G., Nuñez, V., Paschke, K., Thiel, M. and Yannicelli, B. (2019). Life on the edge: incubation behaviour and physiological performance of squat lobsters in oxygen-minimum conditions. Marine Ecology Progress Series, 623, pp.51-70.

4 Franco-Meléndez, M. T. 2003. Aspectos biológicos-pesqueros del camaroncito rojo *Pleuroncodes monodon* (M. Edwards, 1837) en el litoral peruano. Tesis. Universidad Nacional del Callao.

5 Kiko, R., H. Hauss, M. Dengler, S. Sommer, and F. Melzner. 2015. The squat lobster *Pleuroncodes monodon* tolerates anoxic “dead zone” conditions off Peru. Mar. Biol. 162: 1913–1921. doi:10.1007/s00227-015-2709-6

6 Castillo, R., M. Segura, M. Gutiérrez, F. Ganoza, and S. Peraltilla. 2009. Distribución y biomasa de algunos recursos pelágicos peruanos. Verano 2003. Inf. Inst. del Mar del Perú 36: 36–44.

7 Córdova, J., F. Leiva, B. Leiva, and others. 2009. Informe Final Evaluación hidroacústica de Jurel en la I-II regiones, año 2008. Fip N° 2008-07 293 pp.

8 IMARPE. 2007a. Crucero de investigación de merluza y otros recursos demersales en el verano del 2004. Informe Ejecutivo.

9 IMARPE. 2006. Crucero de Investigación de merluza y otros demersales en el verano del 2006. Crucero BIC José Olaya Balandra 0601-02 21 de enero al 14 de Febrero de 2006. Inf. Ejec. 44.

10 IMARPE. 2007b. Crucero de investigación de merluza y otros recursos demersales en el verano del 2007. Informe Ejecutivo. 50 pp.

11 Castillo, R., S. Peraltilla, and M. Segura. 2008. Evaluación hidroacústica de anchoveta y otros recursos pelágicos. Agosto y Septiembre 2003, p. 87–95. In Imarpe 35-02. Crucero de evaluación de la biomasa desovante de la anchoveta peruana. Método de la producción de huevos (MPH). Invierno 2003, 2004, 2005.

12 Gutiérrez, M., A. Ramirez, S. Bertrand, O. Móron, and A. Bertrand. 2008. Ecological niches and areas of overlap of the squat lobster ‘munida’ (*Pleuroncodes monodon*) and anchoveta (*Engraulis ringens*) off Peru. Prog. Oceanogr. 79: 256–263. doi:10.1016/j.pocean.2008.10.019

13 Haig, J. 1968. A Report On Anomuran and Brachyuran Crabs Collected in Peru During Cruise 12 of R/v Anton Bruun 1). Crustaceana 15: 19–30. doi:10.1163/156854068X00728

14 Aguilar Luna, S. 2011. Aspectos biológicos de tres invertebrados marinos de valor comercial. Crucero BIC Olaya 0305-06, p. 343–345. In IMARPE 38-02. La Merluza peruana *Merluccius gayi peruanus* Ginsburg evaluada en el otoño del 2003.

15 Ahumada, M., D. Queirolo, E. Acuña, and E. Gaete. 2013. Caracterización de agregaciones de langostino colorado (*Pleuroncodes monodon*) y langostino amarillo (*Cervimunida johni*) mediante un sistema de filmación. Lat. Am. J. Aquat. Res. 41: 199–208.

16 Arana, P., and M. F. Pizarro. 1970. Análisis de los parámetros biométricos de los langostinos amarillo (*Cervimunida johni*) y zanahoria (*Pleuroncodes monodon*) de la costa de Valparaíso. Investig. Mar. 1: 285–316.

17 Bahamonde, N., G. Henríquez, and A. Zuleta. 1986. Population dynamics and fisheries of squat lobsters, family Galatheidae, in Chile. Can. J. Fish. Aquat. Sci. 92: 254–268.

18 Bertrand, A., F. Gerlotto, S. Bertrand, and others. 2008. Schooling behaviour and environmental forcing in relation to anchoveta distribution: An analysis across multiple spatial scales. Prog. Oceanogr. 79: 264–277. doi:10.1016/j.pocean.2008.10.018

19 Espinoza-Fuenzalida, N. L., E. Acuña, I. a. Hinojosa, and M. Thiel. 2012. Reproductive biology of two species of squat lobsters – female receptivity and interbrood intervals. J. Crustac. Biol. 32: 565–574. doi:10.1163/193724012X626601

20 Gallardo, V. A., J. I. Canete, R. Roa, S. Enríquez-Briones, and M. Baltazar. 1994. Recluitment of the squat lobster *Pleuroncodes monodon* on the continental shelf off Central Chile. J. Crustac. Biol. 14: 665–669.

21 Gallardo, V. A., M. Palma, F. D. Carrasco, D. Gutiérrez, L. a. Levin, and J. I. Cañete. 2004. Macrobenthic zonation caused by the oxygen minimum zone on the shelf and slope off central Chile. Deep Sea Res. Part II Top. Stud. Oceanogr. 51: 2475–2490. doi:10.1016/j.dsr2.2004.07.028

22 Acuña, E., G. Conan, L. Cid, R. Alarcón, and L. Cubillos. 2004b. Evaluación directa de langostino colorado entre la III y IV regiones, año 2003. Univ. Catol. del Norte. FIP 2003-03 141 pp.

23 IMARPE. 2009. Crucero de evaluación de merluza y otros demersales en otoño 2009. Informe Ejecutivo. IMARPE Cr0906-07.

24 Caccha, L., A. Rodríguez, and J. Antón. 2004. Estructura comunitaria bentodemersal peruana durante el otoño austral 2001. Inf. Inst. del Mar del Perú 32: 289–296.

25 Franco-Meléndez, M. 2012. Breeding behavior and sex ratio variation of *Pleuroncodes monodon* (Crustacea: Galatheidae) off the Peruvian coast. Ciencias Mar. 38: 441–457. doi:10.7773/cm.v38i2.2032

26 Queirolo, D., K. Erzini, C. F. Hurtado, E. Gaete, and M. C. Soriguer. 2011. Species composition and bycatches of a new crustacean trawl in Chile. Fish. Res. 110: 149–159. doi:10.1016/j.fishres.2011.04.001

27 Roa, R., and R. Bahamonde. 1993. Growth and expansion of an exploited population of the squat lobster (*Pleuroncodes monodon*) after 3 years without harvesting. Fish. Res. 18: 305–319. doi:10.1016/0165-7836(93)90159-5

28 Roa, R., and F. Tapia. 1998. Spatial differences in growth and sexual maturity between branches of a large population of the squat lobster *Pleuroncodes monodon*. Mar. Ecol. Prog. Ser. 167: 185–196. doi:10.3354/meps167185

29 Gutiérrez, J., and O. Zúñiga. 1977. *Pleuroncodes monodon* H. Milne Edwards, en la Bahía de Mejillones del sur, Chile (Crustacea, Decapoda, Anomura). Rev. Biol. Mar. Valparaiso 16: 161–169.

30 Roa, R. 1993. Annual growth and maturity function of the squat lobster *Pleuroncodes monodon* in central Chile. Mar. Ecol. Prog. Ser. 97: 157–166. doi:10.3354/meps097157

31 Roa, R., V. Gallardo, B. Ernst, M. Baltazar, J. I. Cañete, and S. Enríquez-Briones. 1995. Nursery ground, age structure and abundance of juvenile squat lobster *Pleuroncodes monodon* on the continental shelf off central Chile. Mar. Ecol. Prog. Ser. 116: 47–54.

32 Bohm, M. G., C. Hernández, L. Ossa, J. Letelier, H. Reyes, and R. Aravena. 2011. Caracterización y cuantificación de la fauna acompañante en las capturas de cerco, Región de Arica y Parinacota, Tarapacá y Antofagasta, 2009. IFOP. Inf. Final Consolidado, Pesca Investig. 73.

33 Castillo, J., M. A. Barbieri, M. Espejo, and V. Castati. 2000. INFORME FINAL Evaluación acústica del reclutamiento de anchoveta y sardina común en la zona centro-sur. IFOP, FIP No 99-13 230.

34 Braun, M., H. Reyes, J. Letelier, M. Pizarro, V. Valenzuela, V. Castati, J. Saavedra, and F. Espindola. 2008. Monitoreo de las condiciones bio-oceanográficas entre la I y IV Regiones, año 2007. IFOP. Fip No 2007-11 408.

35 Oyarzún G., C., S. Gacitúa B., M. Araya C., and others. 2006. Informe final. Evaluación del stock desovante de anchoveta y sardina común entre la V y X regiones, año 2005. IFOP. Fip No 2005-02 1–146.

36 Bahamonde, R. 2002. Evaluación directa de langostino colorado y langostino amarillo entre la II y VIII Regiones, año 2001. IFOP. Fip 2001-06 269 pp.

37 Bahamonde, R., B. Leiva, C. Canales, and others. 2004. Informe final. Evaluación directa de langostino colorado y langostino amarillo entre la II y VIII Regiones, año 2003. IFOP. Fip No 2003-31 325.

38 Acuña, E., R. Alarcon, H. Arancibia, and others. 2004a. Evaluación directa de langostino colorado y langostino amarillo entre la II y VIII regiones, año 2004. Informe Final. Proyecto FIP No 2004-11, 405 pp.

39 Haye, P. A., P. Salinas, E. Acuña, and E. Poulin. 2010. Heterochronic phenotypic plasticity with lack of genetic differentiation in the southeastern Pacific squat lobster *Pleuroncodes monodon*. Evol. Dev. 12: 628–634. doi:10.1111/j.1525-142X.2010.00447.x

40 Córdova, J., R. Vargas, V. Castati, and others. 2014. Informe final. Evaluación del stock desovante de anchoveta en la XV, I y II Regiones, año 2012. IFOP. Fip No 2013-03 475.

41 IMARPE. 2014. Crucero de investigación de la merluza y otros demersales en el otoño de 2014. Cr. 1405-06 BIC Humboldt. Inf. IMARPE, 83 pp.

42 del Solar, E., and V. Alamo. 1970. Exploración sobre la distribución de langostinos y otros crustáceos en la Zona Norte. Crucero SNP-1 7009 (Primera Parte). Serie de Informes especiales N° IM-70.

43 Segura, M., and R. Castillo. 1996. Distribución y Concentración de la “Munida” (*Pleuroncodes monodon*) en el verano de 1996. Inf. Inst. Mar Perú

44 Elliot, W., and F. Paredes. 1996. Estructura especiológica del subsistema costero E/P San Jacinto I9512-9601. Inf. Inst. del Mar del Perú 121: 14–26.

45 Elliot, W., and F. Paredes. 1997. Estructura especialógica de los subsistemas demersal costero y pelagial costero prospección E/E Huamanga 9611-12. Inf. Inst. Mar Perú 125: 48–65.

46 Elliot, W., and M. Samame. 2001. Crucero de evaluación de la merluza y otros recursos demersales BIC José Olaya Balandra 0004-05, de Huarmey (10°S) a Puerto Pizarro (3°29`S). Inf. Inst. Mar Perú 160: 79–97.

47 Elliott, W., L. Caccha, and C. Benites. 2011. Estructura del subsistema demersal en otoño 2003. Crucero BIC Olaya 0305-06. Inf. Inst. Mar Perú 38: 197–202.

48 Elliot, W., L. Caccha, and C. Benites. 2011. Estructura del subsistema demersal durante el verano 2004. Crucero BIC Olaya 0401-02. Inf. Inst. Mar Perú 38: 321–334.

49 Ballón, M., A. Bertrand, A. Lebourges-Dhaussy, M. Gutiérrez, P. Ayón, D. Grados, and F. Gerlotto. 2011. Is there enough zooplankton to feed forage fish populations off Peru? An acoustic (positive) answer. Prog. Oceanogr. 91: 360–381. doi:10.1016/j.pocean.2011.03.001

50 Espinoza, P. 2014. Trophic dynamics in the northern Humboldt Current system: insights from stable isotopes and stomach content analyses. PHD Thesis. Université de Bretagne Occidentale.

51 Aguilar Luna, S., and J. Rubio Rodriguez. 2011. Invertebrados marinos acompañantes de la merluza peruana en verano 2004: Crucero BIC Olaya 0401-02. Inst. del Mar del Perú, Inf. 38: 343–345.

52 del Solar, E., and M. Mistakidis. 1971. Informe crucero SNP-1 7105 Exploración de crustáceos. Inf. Inst. Mar Perú IM–89: 14.

53 del Solar, E., and L. Flores. 1972. Exploración de crustáceos (Zona sur) Crucero SNP-1 7201. Ser. Inf. Espec. N° IM-107, IMARPE, Perú.

54 Elliott, W., A. Ramírez, and R. Gónzales. 2012. Bancos naturales entre Punta Herradura y Playa Chica, Huancho, Junio 2002. Inf. Inst. Mar Perú 39: 102–109.

55 Paredes, F., and W. Elliott. 1997. Estudio biológico pesquero del “camaroncito rojo” o “Munida” *Pleuroncodes monodon* frente a Pucusuna, Lima. Informe progresivo. Inst. del Mar del Perú 57: 21–26.

56 Gutiérrez, M., R. Castillo, and S. Peraltilla. 1999. Biomasa de recursos pesqueros a finales de la primavera 1998. Crucero BIC Jose Olaya Balandra 8011-12. Inf. Inst. del Mar, Perú 146: 11–18.

57 Castillo, P., M. Gutiérrez, and N. Herrera. 2004. Biomasa de siete especies pelágicas abundantes en el mar peruano durante el verano austral 2001. Inf. Inst. del Mar del Perú 32: 29–36.

58 IMARPE. 2015. Crucero 1502-04 de Evaluación hidroacústica de los recursos pelágicos. Informe ejecutivo. Inst. del Mar del Perú 42.

59 Barbieri, M. A., C. Canales, B. Leiva, R. Bahamonde, T. Peñailillo, H. Pool, and C. Montenegro. 2001. Evaluación Directa de langostino colorado de la I a IV Regiones, 1999. Informes Técnicos FIP. FIP/IT No 99-30. 170.
